1 **Title:** SARS-CoV-2 spike glycoprotein vaccine candidate NVX-CoV2373 elicits  
2 immunogenicity in baboons and protection in mice

3

4 **Authors and Affiliations:**

5 Jing-Hui Tian<sup>1 #</sup>, Nita Patel<sup>1 #</sup>, Robert Haupt<sup>2 #</sup>, Haixia Zhou<sup>1</sup>, Stuart Weston<sup>2</sup>, Holly  
6 Hammond<sup>2</sup>, James Lague<sup>2</sup>, Alyse D. Portnoff<sup>1</sup>, James Norton<sup>1</sup>, Mimi Guebre-Xabier<sup>1</sup>,  
7 Bin Zhou<sup>1</sup>, Kelsey Jacobson<sup>1</sup>, Sonia Maciejewski<sup>1</sup>, Rafia Khatoon<sup>1</sup>, Malgorzata  
8 Wisniewska<sup>1</sup>, Will Moffitt<sup>1</sup>, Stefanie Kluepfel-Stahl<sup>1</sup>, Betty Ekechukwu<sup>1</sup>, James Papin<sup>3</sup>,  
9 Sarathi Boddapati<sup>4</sup>, C. Jason Wong<sup>4</sup>, Pedro A. Piedra<sup>5</sup>, Matthew B. Frieman<sup>2</sup>, Michael  
10 J. Massare<sup>1</sup>, Louis Fries<sup>1</sup>, Karin Lövgren Bengtsson<sup>6</sup>, Linda Stertman<sup>6</sup>, Larry  
11 Ellingsworth<sup>1</sup>, Gregory Glenn<sup>1</sup>, and Gale Smith<sup>1 \*</sup>

12

13 <sup>1</sup>Novavax, Inc. 21 Firstfield Road, Gaithersburg, MD, 20878, USA. [jhtian@Novavax.com](mailto:jhtian@Novavax.com)  
14 (J.H.T.), [npatel@novavax.com](mailto:npatel@novavax.com) (N.P.), [hzhou@novavax.com](mailto:hzhou@novavax.com) (H.Z.),  
15 [aportnoff@Novavax.com](mailto:aportnoff@Novavax.com) (A.D.P.), [jnorton@Novavax.com](mailto:jnorton@Novavax.com) (J.M), [mguebre-  
xabier@Novavax.com](mailto:mguebre-<br/>16 xabier@Novavax.com) (M.G.X.), [bzhou@Novavax.com](mailto:bzhou@Novavax.com) (B.Z.),  
17 [kjacobson@Novavax.com](mailto:kjacobson@Novavax.com) (K.J.), [SMaciejewski@Novavax.com](mailto:SMaciejewski@Novavax.com) (S.M.),  
18 [rkhatoon@Novavax.com](mailto:rkhatoon@Novavax.com) (R.K.), [mwisniewska@Novavax.com](mailto:mwisniewska@Novavax.com) (M.W.),  
19 [wmoffitt@Novavax.com](mailto:wmoffitt@Novavax.com) (W.M.), [skluepfel-stahl@Novavax.com](mailto:skluepfel-stahl@Novavax.com) (S.K.S.),  
20 [bekechukwu@Novavax.com](mailto:bekechukwu@Novavax.com) (B.E.), [MMassare@Novavax.com](mailto:MMassare@Novavax.com) (M.J.M.),  
21 [lfries@Novavax.com](mailto:lfries@Novavax.com) (L.F.), [lellingsworth@novavax.com](mailto:lellingsworth@novavax.com) (L.E.), [gglenn@Novavax.com](mailto:gglenn@Novavax.com)  
22 (G.G.), [GSmith@Novavax.com](mailto:GSmith@Novavax.com) (G.S.)

23 <sup>2</sup>University of Maryland, School of Medicine, 685 West Baltimore St, Baltimore, MD  
24 21201, USA. [mfrieman@som.umaryland.edu](mailto:mfrieman@som.umaryland.edu). (M.B.F., R.H., S.W., H.H.)

25 <sup>3</sup>University of Oklahoma, Health Sciences Center, Department of Pathology, Division of  
26 Comparative Medicine, 940 Stanton L. Young, BMS 203, Oklahoma City, OK, 73104  
27 USA. Email: [james-papin@ouhsc.edu](mailto:james-papin@ouhsc.edu) (J.P.)

28 <sup>4</sup>Catalent Paragon Gene Therapy, 801 West Baltimore Street, Baltimore, MD 21201.  
29 USA. [Sboddapti@catalent.com](mailto:Sboddapti@catalent.com) (S.B.), [Chun-Ho.Wong@catalent.com](mailto:Chun-Ho.Wong@catalent.com) (C.J.W.)

30 <sup>5</sup>Department of Molecular Virology and Microbiology, and Pediatrics, Baylor College of  
31 Medicine, Houston, Texas. [ppiedra@bcm.edu](mailto:ppiedra@bcm.edu) (P.A.P.)

32 <sup>6</sup>Novavax AB, Kungsgatan 109, Uppsala, SE-753 18, SE. [KLövgren@Novavax.com](mailto:KLövgren@Novavax.com)  
33 (K.L.B.), [LStertman@Novavax.com](mailto:LStertman@Novavax.com) (L.S.)

34 \*Correspondence: [GSmith@Novavax.com](mailto:GSmith@Novavax.com) (G.S.)

35 #JHT, RH and NP each contributed equally as co-lead authors.

36  
37

38 **Abstract**

39 The COVID-19 pandemic continues to spread throughout the world with an urgent need  
40 for a safe and protective vaccine to effectuate herd immunity to control the spread of  
41 SARS-CoV-2. Here, we report the development of a SARS-CoV-2 subunit vaccine  
42 (NVX-CoV2373) produced from the full-length spike (S) protein, stabilized in the  
43 prefusion conformation. Purified NVX-CoV2373 S form 27.2nm nanoparticles that are  
44 thermostable and bind with high affinity to the human angiotensin-converting enzyme 2  
45 (hACE2) receptor. In mice and baboons, low-dose NVX-CoV2373 with saponin-based  
46 Matrix-M adjuvant elicits high titer anti-S IgG that is associated with blockade of hACE2  
47 receptor binding, virus neutralization, and protection against SARS-CoV-2 challenge in  
48 mice with no evidence of vaccine-associated enhanced respiratory disease (VAERD).  
49 NVX-CoV2373 vaccine also elicits multifunctional CD4<sup>+</sup> and CD8<sup>+</sup> T cells, CD4<sup>+</sup> T  
50 follicular helper T cells (Tfh), and the generation of antigen-specific germinal center  
51 (GC) B cells in the spleen. These results support the ongoing phase 1/2 clinical  
52 evaluation of the safety and immunogenicity of NVX-CoV2327 with Matrix-M  
53 (NCT04368988).

## 54 **Introduction**

55 Rapid global transmission of SARS-CoV-2 has followed the initial outbreak in Wuhan,  
56 Hubei Province, China first reported in December 2019. The World Health  
57 Organization's (WHO) 29 June 2020 COVID-19 Situation Report-160 reports 10 million  
58 confirmed cases worldwide and 500,000 deaths (5.1% fatality rate)<sup>1-2</sup>. Current estimates  
59 suggest a substantial asymptomatic incubation period during which transmission  
60 occurs, and a basic reproduction number ( $R_0$ ) of 2.23-2.51<sup>3</sup>, greater than any 20th or  
61 21st century pandemic influenza virus. The urgent need for a safe, effective, stable,  
62 globally deployable, preventative vaccine has led to an unprecedented collaboration  
63 between vaccine developers, manufacturers, and distributors in concert with  
64 government and academic programs<sup>4</sup>.

65 The SARS-CoV-2 spike (S) glycoprotein is a major component of the virus envelope,  
66 essential for receptor binding, fusion, virus entry, and a target of host immune defense<sup>5-</sup>  
67 <sup>9</sup>. The SARS-CoV-2 S glycoprotein is a class I fusion protein produced as a large 1273  
68 amino acid inactive precursor (S<sub>0</sub>). Unique to SARS-CoV-2 is the insertion of a  
69 polybasic RRAR furin-like cleavage motif in the S1/S2 cleavage site<sup>10</sup>. Proteolytic  
70 cleavage of the S-protein generates the S2 stalk that is conserved across human  
71 coronaviruses and the less conserved S1 cap<sup>11</sup>. The N-terminal domain (NTD) and the  
72 receptor-binding domain (RBD) are located in the S1 subunit. The fusion peptide (FP),  
73 two heptad repeats (HR1 and HR2), central helix (CH), transmembrane (TM) domain,  
74 and cytoplasmic tail (CT) are located in the S2 subunit. Three S1/S2 protomers non-  
75 covalently associate to form the functional S-trimer. Like other fusion proteins, the  
76 SARS-CoV S-trimer is metastable and undergoes significant structural rearrangement

77 from a prefusion conformation to a thermostable postfusion conformation upon S-  
78 protein receptor binding and proteolytic cleavage<sup>12</sup>. Rearrangement exposes the  
79 hydrophobic FP allowing insertion into the host cell membrane, facilitating virus/host cell  
80 membrane alignment, fusion, and virus entry through endocytosis<sup>13-16</sup>.

81 We have developed a SARS-CoV-2 S subunit vaccine (NVX-CoV2373) constructed  
82 from the full-length S-protein and produced in the established Sf9 insect cell expression  
83 system. Here, we describe a stable prefusion S-protein structure generated by mutating  
84 the furin cleavage site to be resistant to cleavage and utilization of two proline  
85 substitutions at the apex of the central helix<sup>11</sup>. Here, we show that administering the  
86 NVX-CoV2373 with Matrix-M adjuvant in a nonhuman primate and mice models induces  
87 a Th1 dominant B- and T-cell response, hACE2 receptor blocking antibodies and  
88 SARS-CoV-2 neutralizing antibodies. In mice, the vaccine was protective with no  
89 evidence of vaccine associated enhanced respiratory disease (VAERD). These results  
90 support the clinical development of the NVX-CoV2373 vaccine for prevention of COVID-  
91 19 (NCT04368988).

## 92 **Results**

93 **SARS-CoV-2 spike glycoproteins.** The SARS-CoV-2 S-gene (MN908947.3,  
94 nucleotides 21563-25384) encoding the full-length 1273 amino acid spike protein was  
95 used as a backbone to produce spike protein variants. The BV2365 single mutant was  
96 generated by mutating the putative furin cleavage site 682-RRAR-685 to 682-QQAQ-  
97 685, and the NVX-CoV2373 double mutant was generated with 682-QQAQ-685 and 2-  
98 proline substitutions at residues K986P and V987P (**Fig. 1A**). Synthetic full-length wild-

99 type (WT), the single mutant BV2365, and double mutant NVX-CoV2373 genes were  
100 codon optimized for insect cells and cloned into recombinant baculovirus for expression  
101 in Sf9 cells.

102 **Biophysical characterization and stability.** Purified SARS-CoV-2 WT, BV2365, and  
103 NVX-CoV2373 S-proteins when reduced migrated with an apparent molecular weight of  
104 180 kDa (**Fig. 1B**). Dynamic light scattering (DLS) showed the WT S-protein had a Z-  
105 average particle diameter of 69.53 nm compared to a 2-fold smaller particle size of  
106 BV2365 (33.4 nm) and NVX-CoV2373 (27.2 nm). The polydispersity index (PDI)  
107 indicated that BV2365 and NVX-CoV2373 particles were generally uniform in size,  
108 shape, and mass (PDI = 0.25-0.29) compared to the wild-type spike-protein (PDI =  
109 0.46) (**Table 1**).

110 The thermal stability of the S-trimers was determined by differential scanning  
111 calorimetry (DSC). The thermal transition temperature of the WT S-spike ( $T_{\max} = 58.6^{\circ}\text{C}$ )  
112 was similar to BV2365 and NVX-CoV2373 with a  $T_{\max} = 61.3^{\circ}\text{C}$  and  $60.4^{\circ}\text{C}$ , respectively  
113 (**Table 1**). Of greater significance, was the 3 - 5 fold increased enthalpy of transition  
114 required to unfold the BV2365 and NVX-CoV2373 variants ( $\Delta H_{\text{cal}} = 466$  and  $732$   
115 kJ/mol, respectively) compared to the lower enthalpy required to unfold the WT spike  
116 protein ( $\Delta H_{\text{cal}} = 153$  kJ/mol). These results are consistent with improved thermal  
117 stability of the BV2365 and NVX-CoV2373 compared to that of WT spike protein (**Table**  
118 **1**).

119 **Transmission Electron Microscopy (TEM) and 2D Class Averaging.** TEM and two-  
120 dimensional (2D) class averaging were used to determine the ultrastructure of NVX-  
121 Cov2373. High magnification (67,000x and 100,000x) TEM images of negatively stained

122 NVX-CoV2373 showed particles corresponding to S-protein homotrimers. An automated  
123 picking protocol supplemented with manual picking was used to construct 2D class  
124 average images<sup>17, 18</sup>. Two rounds of 2D class averaging of homotrimeric structures  
125 revealed a triangular particle appearance with a 15 nm length and 13 nm width (**Fig. 1C,**  
126 **top left**). Overlaying the recently solved cryoEM structure of the SARS-CoV-2 spike  
127 protein ectodomain (EMD ID: 21374)<sup>19, 20</sup> over the 2D NVX-Cov2373 image showed a  
128 good fit with the crown-shaped S1 (NTD and RBD) and the S2 stem (**Fig. 1C, bottom**  
129 **left**). Also apparent in the 2D images was a faint projection that protruded from the tip of  
130 the trimeric structure opposite of the NTD/RBD crown (**Fig. 1C, top right**). 2D class  
131 averaging using a larger box size showed these faint projections form a connection  
132 between the S-trimer and an amorphous structure. We speculate these faint projections  
133 likely represents the HR2 domain which is highly flexible in the prefusion conformation<sup>19</sup>  
134 with the TM domain anchored within a polysorbate 80 micelle (**Fig. 1C, bottom right**).

135 **SARS-CoV-2 S protein binding to hACE2 receptor by BLI and ELISA.** S-protein  
136 binding to the hACE2 receptor was determined using bio-layer interferometry (BLI). To  
137 assess binding, a histidine-tagged hACE2 receptor was coupled to nickel charged  
138 nitrilotriacetic acid (Ni-NTA) biosensor tips. The hACE2 coated biosensor tips were  
139 dipped in wells containing serially diluted (4.7 nM to 300 nM) recombinant S protein.  
140 Dissociation kinetics showed that the S-proteins remained tightly bound as evident by  
141 minimal or no dissociation over 900 seconds of observation in the absence of fluid-  
142 phase S protein (**Fig. 2A, 2B, 2C**).

143 We next determined the specificity of receptor binding using an ELISA method. In  
144 this evaluation, histidine-tagged hACE2 or hDDP-4 receptors over concentration range

145 of 0.0001-5  $\mu\text{g mL}^{-1}$  were added to ELISA plates coated with WT, BV2365 or NVX-  
146 CoV2373 and binding was detected with HRP conjugated anti-histidine antibody. WT,  
147 BV2365, and NVX-CoV2373 proteins specifically bound hACE2 but failed to bind the  
148 hDPP-4 receptor used by MERS-CoV ( $\text{IC}_{50} > 5000 \text{ ng mL}^{-1}$ ). WT and BV2365 bound to  
149 hACE2 with similar affinity ( $\text{IC}_{50} = 36\text{-}38 \text{ ng mL}^{-1}$ ), while NVX-CoV2373 attained 50%  
150 saturation of hACE2 binding at 2-fold lower concentration ( $\text{IC}_{50} = 18 \text{ ng mL}^{-1}$ ) (**Fig. 2D**,  
151 **2E, 2F**).

152 **SARS-CoV-2 S stability under stressed conditions.** The stability of a COVID-19  
153 vaccine for global distribution is critical. The structural integrity of the NVX-CoV2373  
154 spike protein with the 2-prolines substitutions and BV2365 without the 2-proline  
155 substitutions was assessed with different environmental stress conditions using the  
156 hACE2 ELISA. Incubation of NVX-CoV2373 at pH extremes (48 hours at pH 4 and pH  
157 9), with prolonged agitation (48 hours), through freeze/thaw (2 cycles), or elevated  
158 temperature (48 hours at 25°C and 37°C) had no effect on hACE2 receptor binding  
159 ( $\text{IC}_{50} = 14.0 - 18.3 \text{ ng mL}^{-1}$ ). Only oxidizing conditions with hydrogen peroxide reduced  
160 the binding of NVX-CoV2373 by 8-fold ( $\text{IC}_{50} = 120 \text{ ng mL}^{-1}$ ) (**Fig. 3A**). BV2365 without  
161 the 2-proline substitutions was less stable as determined by a significant reduction in  
162 hACE2 binding ( $\text{IC}_{50} = 56.8\text{-}143.4 \text{ ng mL}^{-1}$ ) under multiple conditions (**Fig. 3B**). These  
163 results confirmed that the NVX-CoV2373 with the 2-proline mutation had significantly  
164 greater stability and was therefore selected for further evaluation.

165 **NVX-CoV2373 vaccine immunogenicity in mice.** We next assessed the  
166 immunogenicity of NVX-CoV2373 and the dose-sparing potential of saponin-based  
167 Matrix-M adjuvant. Groups of mice were immunized with a low dose range (0.01  $\mu\text{g}$ ,



168 0.1 µg, 1 µg and 10 µg) of NVX-CoV2373 with 5 µg Matrix-M adjuvant using a single  
169 priming dose or a prime/boost regimen spaced 14-days apart. Animals immunized with  
170 a single priming dose of 0.1-10 µg NVX-CoV2373/Matrix-M had elevated anti-S IgG  
171 titers that were detected 21-28 days after a single immunization (**Fig.4A, right**). Mice  
172 immunized with 10 µg dose of NVX-CoV2373/Matrix-M induced antibodies that blocked  
173 hACE2 receptor binding to S-protein and virus neutralizing antibodies 21- 28-days after  
174 a single priming dose (**Fig. 4B** and **4C**). Animals immunized with the prime/boost  
175 regimen had significantly elevated anti-S IgG titers that were detected 7-16 days  
176 following the booster immunization across all dose levels. Animals immunized with 1  
177 µg and 10 µg NVX-CoV2373/Matrix-M had similar high anti-S IgG titers following  
178 immunization (GMT = 139,000 and 84,000, respectively). Importantly, mice immunized  
179 with 0.1 µg, 1 µg, or 10 µg NVX-CoV/Matrix-M had significantly ( $p \leq 0.00001$ ) higher  
180 anti-S IgG titers compared to mice immunized with 10 µg NVX-CoV2373 without  
181 adjuvant (**Fig. 4A, left**). These results indicate the potential for a 10-fold or greater  
182 dose sparing provided by Matrix-M adjuvant. Furthermore, immunization with two  
183 doses of NVX-CoV2373/Matrix-M elicited high titer antibodies that blocked hACE2  
184 receptor binding to S-protein ( $IC_{50} = 218 - 1642$ ) and neutralized the cytopathic effect  
185 (CPE) of SARS-CoV-2 on Vero E6 cells (100% blocking of CPE = 7680 – 20,000)  
186 across all dose levels (**Fig. 4B** and **4C**).

187 **NVX-CoV2373 protection against SARS-CoV-2 in Ad/CMV/hACE2 mice.** Mice were  
188 vaccinated with NVX-CoV2373 to evaluate the induction of protective immunity against  
189 challenge with SARS-CoV-2 by comparing single-dose or prime/boost vaccination  
190 strategies compared in a live virus challenge model. Mice were immunized with a single

191 priming dose or a prime/boost regimen with NVX-CoV2373/Matrix-M as described  
192 above. Since mice do not support replication of wild-type SARS-CoV-2 virus, on day 52  
193 post initial vaccination, mice were intranasally infected with an adenovirus expressing  
194 hACE2 (Ad/hACE2) to render them permissive. At four days post transduction, mice  
195 were challenged with  $10^5$  pfu/mouse of SARS-CoV-2 (WA1 strain). Following challenge  
196 mice were weighed daily and pulmonary histology and viral load were analyzed at day 4  
197 and 7 post challenge.

198 At 4 days post infection, placebo-treated mice had an average of  $10^4$  SARS-CoV-2  
199 pfu/lung, while the mice immunized with NVX-CoV2373 without Matrix-M had  $10^3$   
200 pfu/lung and those with Matrix-M had limited to no detectable virus load (**Fig. 4D**). The  
201 NVX-CoV2373 with Matrix-M prime-only groups of mice exhibited a dose-dependent  
202 reduction in virus titer, with recipients of the 10  $\mu$ g dose having no detectable virus at  
203 day 4 post infection. Mice receiving 1  $\mu$ g, 0.1  $\mu$ g and 0.01  $\mu$ g doses all showed a  
204 marked reduction in titer compared to placebo-vaccinated mice. In the prime/boost  
205 groups, mice immunized with 10  $\mu$ g, 1  $\mu$ g and 0.1  $\mu$ g doses had almost undetectable  
206 lung virus loads, while the 0.01  $\mu$ g group displayed a reduction of at least 1 log relative  
207 to placebo animals. Weight loss during the experiment paralleled the viral load findings,  
208 with animals receiving single doses of 10  $\mu$ g, 1  $\mu$ g and 0.1  $\mu$ g NVX-CoV2373/Matrix-M  
209 showing marked protection from weight loss compared to the unvaccinated placebo  
210 animals (**Fig. 4E**). The mice receiving a prime and boost vaccination with adjuvanted  
211 vaccine also demonstrated significant protection against weight loss at all dose levels  
212 (**Fig. 4F**). In addition, we compared the prime/boost regimens using 10  $\mu$ g of either  
213 adjuvanted or unadjuvanted NVX-CoV2373. The mice receiving the prime/boost with

214 adjuvant were significantly protected from weight loss relative to placebo mice, while the  
215 group immunized with 10  $\mu$ g NVX-CoV2373 alone were not protected against weight  
216 loss (**Fig. 4G**). These results confirm that NVX-CoV2373 confers protection against  
217 SARS-CoV-2 and that low doses of the vaccine associated with lower serologic  
218 responses do not exacerbate weight loss or demonstrate exaggerated illness.

219 **Histopathology.** Lung histopathology was evaluated on days 4 and day 7 post  
220 challenge. At day 4 post challenge, placebo-immunized mice showed denudation of  
221 epithelial cells in the large airways with thickening of the alveolar septa surrounded by a  
222 mixed inflammatory cell population. Periarteriolar cuffing was observed throughout the  
223 lungs with inflammatory cells consisting primarily of neutrophils and macrophages. By  
224 day 7 post infection, the placebo-treated mice displayed peribronchiolar inflammation  
225 with increased periarteriolar cuffing. The thickened alveolar septa remain with increased  
226 diffuse interstitial inflammation throughout the alveolar septa (**Fig. 5**).

227 The NVX-CoV2373 immunized mice showed significant reduction in lung pathology  
228 at both day 4 and day 7 post infection in a dose-dependent manner. The prime only  
229 group displays reduced inflammation at the 10  $\mu$ g and 1  $\mu$ g dose with a reduction in  
230 inflammation surrounding the bronchi and arterioles compared to placebo mice. In the  
231 lower doses of the prime-only groups, lung inflammation resembles that of the placebo  
232 groups, correlating with weight loss and lung virus titer. The prime/boost immunized  
233 groups displayed a significant reduction in lung inflammation for all doses tested, which  
234 again correlated with lung viral titer and weight loss data. The epithelial cells in the large  
235 and small bronchi at day 4 and 7 were substantially preserved with minimal bronchiolar  
236 sloughing or signs of viral infection. The arterioles of animals immunized with 10  $\mu$ g, 1

237  $\mu\text{g}$  and 0.1  $\mu\text{g}$  doses have minimal inflammation with only moderate cuffing seen in the  
238 0.01  $\mu\text{g}$  dose, similar to placebo. Alveolar inflammation was reduced in animals that  
239 received the higher doses with only the lower 0.01  $\mu\text{g}$  dose with inflammation (**Fig. 5**).  
240 These data demonstrate that NVX-CoV2373 reduces lung inflammation after challenge  
241 and that even doses and regimens of NVX-CoV2373 that elicit minimal or no detectable  
242 neutralizing activity are not associated with any obvious exacerbation of the  
243 inflammatory response to the virus.

244 **Multifunctional cytokine analysis of CD4<sup>+</sup> and CD8<sup>+</sup> T cells in mice.** To determine  
245 the role of Matrix-M in generating T cell responses, we immunized groups of mice (N =  
246 6/group) with 10  $\mu\text{g}$  NVX-CoV2373 alone or with 5  $\mu\text{g}$  Matrix-M in a 2-dose regimen  
247 spaced 21-days apart. Antigen-specific T cell responses were measured by ELISPOT  
248 and intracellular cytokine staining (ICCS) from spleens collected 7-days after the  
249 second immunization (study day 28). The number of IFN- $\gamma$  secreting cells after *ex vivo*  
250 stimulation increased 7-fold in spleens of mice immunized with NVX-CoV2373/Matrix-  
251 M compared to NVX-CoV2373 alone as measured by the ELISPOT assay (**Fig. 6A**). In  
252 order to examine CD4<sup>+</sup> and CD8<sup>+</sup> T cell responses separately, ICCS assays were  
253 performed in combination with surface marker staining. Data shown were gated on  
254 CD44<sup>hi</sup> CD62L<sup>-</sup> effector memory T cell population. Importantly, we found the frequency  
255 of IFN- $\gamma$ <sup>+</sup>, TNF- $\alpha$ <sup>+</sup>, and IL-2<sup>+</sup> cytokine-secreting CD4<sup>+</sup> and CD8<sup>+</sup> T cells was  
256 significantly higher ( $p < 0.0001$ ) in spleens from the NVX-CoV2373/Matrix-M immunized  
257 mice compared to mice immunized without adjuvant (**Fig. 6B** and **6C**). Further, we  
258 noted the frequency of multifunctional CD4<sup>+</sup> and CD8<sup>+</sup> T cells, which simultaneously  
259 produce at least two or three cytokines was also significantly increased ( $p < 0.0001$ ) in

260 spleens from the NVX-CoV2373/Matrix-M immunized mice (**Fig. 6B** and **6C**).  
261 Immunization with NVX-CoV2373/Matrix-M resulted in higher proportions of  
262 multifunctional phenotype within both CD4<sup>+</sup> and CD8<sup>+</sup> T cell populations. The  
263 proportions of multifunctional phenotypes detected in memory CD4<sup>+</sup> T cells were higher  
264 than those in CD8<sup>+</sup> T cells (**Fig. 6D**).

265 Type 2 cytokine IL-4 and IL-5 secretion from CD4<sup>+</sup> T cells was also determined by  
266 ICCS and ELISPOT respectively. We found that immunization with NVX-  
267 CoV2373/Matrix-M also increased type 2 cytokine IL-4 and IL-5 secretion (2-fold)  
268 compared to immunization with NVX-CoV2373 alone, but to a lesser degree than  
269 enhancement of type 1 cytokine production (e.g. IFN- $\gamma$  increased 20-fold). These  
270 results indicate that administration of the Matrix-M adjuvant led to an antigen-specific  
271 CD4<sup>+</sup> T cell development, which was at least balanced between Th1 and phenotypes  
272 or, in most animals, Th1-dominant (**Supplementary Figure 1**).

273 Having shown that vaccination with NVX-CoV2373/Matrix-M elicited multifunctional,  
274 antigen-specific, CD4<sup>+</sup> T cell responses and virus neutralizing antibodies in mice, we  
275 next evaluated the effect of the immunization on germinal center formation by  
276 measuring the frequency of CD4<sup>+</sup> T follicular helper (Tfh) and germinal center (GC) B  
277 cells in spleens. Addition of Matrix-M adjuvant significantly increased the frequency of  
278 Tfh cells (CD4<sup>+</sup> CXCR5<sup>+</sup> PD-1<sup>+</sup>) ( $p = 0.01$ ), as well as the frequency of GC B cells  
279 (CD19<sup>+</sup>GL7<sup>+</sup>CD95<sup>+</sup>) ( $p = 0.0002$ ) in spleens (**Fig. 7A** and **7B**).

280 **Immunogenicity NVX-CoV2373 vaccine in olive baboons.** Having determined that  
281 low dose levels of NVX-CoV2373 with Matrix-M elicit protective neutralizing antibodies  
282 and promotes the generation of multifunctional antigen-specific T cells in mice, we next

283 evaluated the immunogenicity of the vaccine in adult baboons. In this study, adult olive  
284 baboons were immunized with a dose range (1 µg, 5 µg and 25 µg) of NVX-CoV2373  
285 with 50 µg Matrix-M adjuvant administered by IM injection in two doses spaced 21-days  
286 apart. To assess the adjuvant activity of Matrix-M in nonhuman primates, an additional  
287 group of animals was immunized with 25 µg of NVX-CoV2373 without the adjuvant.  
288 Anti-S protein IgG titers were detected within 21-days of a single priming immunization  
289 in animals immunized with NVX-CoV2373/Matrix-M across all the dose levels (GMT =  
290 1,249-19,000). Anti-S protein IgG titers increased over a log (GMT = 33,000-174,000)  
291 within 1 to 2 weeks following a booster immunization (days 28 and 35) across all of the  
292 dose levels. Importantly, animals immunized with NVX-CoV2373 without adjuvant had  
293 minimum or no detected anti-S IgG titer (GMT <125) after one immunization, which was  
294 not boosted by a second immunization (**Fig. 8A**).

295 We also determined the functionality of the antibodies. Low levels of hACE2 receptor  
296 blocking antibodies were detected in animals following a single immunization with 5 or  
297 25 µg NVX-CoV2373/Matrix-M (GMT = 22-37). Receptor blocking antibody titers were  
298 significantly increased within one to two weeks of the booster immunization across all  
299 groups immunized with NVX-CoV2373/Matrix-M (GMT = 150-600) (**Fig. 8B**). Virus  
300 neutralizing antibodies were also elevated (GMT = 190-446) across all dose groups  
301 after a single immunization with NVX-CoV2373/Matrix-M. Animals immunized with 25  
302 µg NVX-CoV2373 alone had no detectable antibodies that block S-protein binding to  
303 hACE2 (**Fig. 8B**). Neutralizing titers increased 25- to 38-fold following the second  
304 immunization (GMT = 6,400-17,000) (**Fig. 8C**). Animals receiving the NVX-CoV2373  
305 alone had little or no detectable neutralizing antibodies (GMT <100). There was a

306 significant correlation ( $p < 0.0001$ ) between anti-S IgG levels and neutralizing antibody  
307 titers (**Fig. 8D**). The immunogenicity of the adjuvanted vaccine in nonhuman primates is  
308 consistent with the mouse immunogenicity results and further supports the role of  
309 Matrix-M adjuvant in promoting the generation of neutralizing antibodies and dose  
310 sparing.

311 PBMCs were collected 7 days after the second immunization (day 28) and T cell  
312 response was measured by ELISPOT assay. PBMCs from animals immunized with 5  $\mu$ g  
313 or 25  $\mu$ g NVX-CoV2373/Matrix-M had the highest number of IFN- $\gamma$  secreting cells,  
314 which was 5-fold greater on average compared to animals immunized with 25  $\mu$ g NVX-  
315 CoV2373 alone or 1  $\mu$ g NVXCoV2373/Matrix-M (**Fig. 8E**). By ICCS analysis,  
316 immunization with 5  $\mu$ g NVXCoV2373/Matrix-M also showed the highest frequency of  
317 IFN- $\gamma^+$ , IL-2 $^+$ , and TNF- $\alpha^+$  CD4 $^+$  T cells (**Fig. 8F**). This trend was also true for  
318 multifunctional CD4 $^+$  T cells, in which at least two or three type 1 cytokines were  
319 produced simultaneously (**Fig. 8F**). Type 2 cytokine IL-4 level were too low to be  
320 detected in baboons by ELISPOT analysis.

321 We next compared the levels of serum antibodies in recovered COVID-19 patients to  
322 the level of antibodies in NVX-CoV2373/Matrix-M vaccinated baboons. The mean anti-S  
323 IgG levels were 7-fold higher in immunized baboons ( $EC_{50} = 152,060$ , 95%CI, 60,767-  
324 243,354) compared to convalescent serum ( $EC_{50} = 21,136$ , 95%CI, 11,473-30,799).  
325 We also compared the level of functional hACE2 receptor inhibiting (50% RI) titers.  
326 Baboons receiving the vaccine had 8-fold higher binding and receptor inhibiting  
327 antibodies (50% RI = 478, 95%CI, 161.1-794.4) compared to COVID-19 convalescent  
328 serum (50% RI = 61, 95%CI, 35.7-85.5) (**Fig. 9**). Therefore, NVX-CoV2373 vaccine

329 induced binding and functional antibodies in a nonhuman primate at levels comparable  
330 or higher than individuals recovered from COVID-19. Collectively these results support  
331 the development of NVX-CoV2373 for prevention of COVID-19

## 332 **Discussion**

333 Here, we showed that a full-length, stabilized prefusion SARS-CoV-2 spike glycoprotein  
334 vaccine (NVX-CoV2373) adjuvanted by Matrix-M can induce high levels of functional  
335 immunity in mice and baboons, and protects mice expressing hACE2 receptors in a live  
336 SARS-CoV-2 challenge. The functional immunity induced by the nanoparticle vaccine  
337 and Matrix-M adjuvant is clearly dependent on both the adjuvant and antigen  
338 components and mirrors the human experience with influenza hemagglutinin vaccine<sup>21</sup>  
339 and a naïve population with ebola recombinant protein nanoparticle vaccines<sup>22</sup>.  
340 Immunization with NVX-CoV2373 at low doses in mice and nonhuman primate induced  
341 anti-S antibodies, hACE2-receptor inhibiting antibodies, and SARS-CoV-2 neutralizing  
342 antibodies after one dose with significantly increased titers after a booster immunization.  
343 In addition, NVX-CoV2373 vaccine induced CD4<sup>+</sup> and CD8<sup>+</sup> T cell responses, and in  
344 mice provided protection against SARS-CoV-2 challenge. Matrix-M adjuvant was also  
345 shown to enhance Tfh cell and GC B cell development, which are critical for induction  
346 and maintaining of high affinity antibody response. Low, suboptimal doses of NVX-  
347 CoV2373 vaccine did not show evidence of VAERD in challenged mice<sup>23, 24</sup>.

348 While multiple animal models have been developed for infection with human  
349 coronaviruses, including SARS, MERS, and now COVID19, to date none of them fully  
350 represent the pathology or clinical symptoms of human infection. However, the murine  
351 hACE2 transduced challenge model with wild-type virus appears to recapitulate the



352 severe clinical disease seen in humans, although the pathological basis for illness may  
353 differ. Of note, the adenovirus-based hACE-2 transduction itself gives rise to some  
354 background inflammatory changes which are present in all animals and are, of course,  
355 not responsive to prophylaxis targeting SARS-CoV-2. This may make histopathology in  
356 this model less responsive to the vaccine than parameters such as weight loss.  
357 Nonetheless, by blocking and ameliorating the common initiating event, hACE-2  
358 receptor binding, vaccine-induced functional immunity is demonstrated that indicates a  
359 potential for the vaccine to induce a protective immunity. Models utilizing macaques and  
360 baboons specifically have been predictive for human immunogenicity and suggest this  
361 vaccine should continue to be evaluated in these systems as well as in humans. To this  
362 end, the safety, immunogenicity, and efficacy of the NVX-CoV2373 with Matrix-M  
363 adjuvant is currently being evaluated in multiple nonhuman primate models and a phase  
364 1/2 clinical trial (NCT04368988).

## 365 **Methods**

366 **Cell lines, virus, antibody reagents, and receptors.** Vero E6 cells (ATCC, CRL-1586)  
367 were maintained in Minimal Eagles Medium (MEM) supplemented with 10% fetal bovine  
368 serum, 1% glutamine and 1% penicillin and streptomycin. The SARS-CoV-2 (WA-1)  
369 isolated was obtained from the Center for Disease Control (WA-1 strain) and stock virus  
370 prepared in Vero E6 cells. Histidine-tagged hACE2 and histidine-DPP4 receptors were  
371 purchased from Syno Biologics (Beijing, CN). Rabbit anti-SARS-CoV spike protein was  
372 purchased from Biodefense and Emerging Infections Research Resources Repository  
373 (catalog no. NR-4569, BEI Resources, Manassas, VA).

374 **SARS-CoV-2 protein expression.** SARS-CoV-2 constructs were synthetically  
375 produced from the full-length S glycoprotein gene sequence (GenBank MN908947  
376 nucleotides 21563-25384). The full-length S-genes were codon optimized for  
377 expression in *Spodoptera frugiperda* (Sf9) cells and synthetically produced by  
378 GenScript (Piscataway, NJ, USA). The QuikChange Lightning site-directed mutagenesis  
379 kit (Agilent) was used to produce two spike protein variants: modifications by mutating  
380 the S1/S2 cleavage site by mutation of the furin cleavage site (682-RRAR-685) to 682-  
381 QQAQ-685 to be protease resistant and designated as BV2365. The single mutant  
382 BV2365 was further stabilized by introducing two proline substitutions at positions  
383 K986P and V987P (2P) to produce the double mutant, NVX-CoV2373. Full-length S-  
384 genes were cloned between the BamHI – HindIII sites in the pFastBac baculovirus  
385 transfer vector (Invitrogen, Carlsbad, CA) under transcriptional control of the *Autographa*  
386 *californica* polyhedron promoter. Recombinant baculovirus constructs were plaque  
387 purified and master seed stocks prepared and used to produce the working virus stocks.  
388 The baculovirus master and working stock titers were determined using rapid titer kit  
389 (Clontech, Mountain View, CA). Recombinant baculovirus stocks were prepared by  
390 infecting Sf9 cells with a multiplicity of infection (MOI) of  $\leq 0.01$  plaque forming units (pfu)  
391 per cell<sup>25-27</sup>.

392 **Expression and purification.** SARS-CoV-2 S proteins were produced in Sf9 cells  
393 expanded in serum-free medium to a density of  $2-3 \times 10^6$  cell mL<sup>-1</sup> and infected with  
394 recombinant baculovirus at MOI of  $\leq 0.1$  pfu per cell. Cells were cultured at  $27 \pm 2^\circ\text{C}$  and  
395 harvested at 68-72 hours post-infection by centrifugation (4000 x g for 15 min). Cell  
396 pellets were suspended in 25 mM Tris HCl (pH 8.0), 50 mM NaCl and 0.5-1.0% (v/v)

397 TERGITOL NP-9 with leupeptin. S-proteins were extracted from the plasma membranes  
398 with Tris buffer containing NP-9 detergent, clarified by centrifugation at 10,000 x g for 30  
399 min. S-proteins were purified by TMAE anion exchange and lentil lectin affinity  
400 chromatography. Hollow fiber tangential flow filtration was used to formulate the purified  
401 spike protein at 100-150  $\mu\text{g mL}^{-1}$  in 25 mM sodium phosphate (pH 7.2), 300 mM NaCl,  
402 0.02% (v/v) polysorbate 80 (PS 80)<sup>26</sup>. Purified S-proteins were evaluated by 4-12%  
403 gradient SDS-PAGE stained with Gel-Code Blue reagent (Pierce, Rockford, IL) and  
404 purity was determined by scanning densitometry using the OneDscan system (BD  
405 Biosciences, Rockville, MD).

406 **Dynamic light scattering (DLS).** Samples were equilibrated at 25°C and scattering  
407 intensity was monitored as a function of time in a Zetasizer NanoZS (Malvern, UK).  
408 Cumulants analysis of the scattered intensity autocorrelation function was performed  
409 with instrument software to provide the z-average particle diameter and polydispersity  
410 index (PDI).

411 **Differential scanning calorimetry (DSC).** Samples and corresponding buffers were  
412 heated from 4°C to 120°C at 1°C per minute and the differential heat capacity change  
413 was measured in a NanoDSC (TA Instruments, New Castle, DE). A separate buffer  
414 scan was performed to obtain a baseline, which was subtracted from the sample scan  
415 to produce a baseline-corrected profile. The temperature where the peak apex is  
416 located is the transition temperature ( $T_{\text{max}}$ ) and the area under the peak provides the  
417 enthalpy of transition ( $\Delta H_{\text{cal}}$ ).

418 **Transmission electron microscopy (TEM) and 2D class averaging.** Electron  
419 microscopy was performed by Nanolmaging Services (San Diego, CA) with a FEI Tecani

420 T12 electron microscope, operated at 120keV equipped with a FEI Eagle 4k x 4k CCD  
421 camera. SARS-CoV-2 S proteins were diluted to 2.5  $\mu\text{g mL}^{-1}$  in formulation buffer. The  
422 samples (3  $\mu\text{L}$ ) were applied to nitrocellulose-supported 400-mesh copper grids and  
423 stained with uranyl format. Images of each grid were acquired at multiple scales to  
424 assess the overall distribution of the sample. High-magnification images were acquired  
425 at nominal magnifications of 110,000x (0.10 nm/pixel) and 67,000x (0.16 nm/pixel). The  
426 images were acquired at a nominal under focus of -1.4 $\mu\text{m}$  to -0.8 $\mu\text{m}$  (110,000x) and  
427 electron doses of  $\sim 25 \text{ e}/\text{\AA}^2$ .

428 For class averaging, particles were identified at high magnification prior to  
429 alignment and classification. The individual particles were selected, boxed out, and  
430 individual sub-images were combined into a stack to be processed using reference-free  
431 classification. Individual particles in the 67,000x high magnification images were  
432 selected using an automated picking protocol<sup>17</sup>. An initial round of alignments was  
433 performed for each sample, and from the alignment class averages that appeared to  
434 contain recognizable particles were selected for additional rounds of alignment. These  
435 averages were used to estimate the percentage of particles that resembled single  
436 trimers and oligomers. A reference-free alignment strategy based on XMIPP processing  
437 package was used for particle alignment and classification<sup>18</sup>.

438 **Kinetics of SARS-CoV-2 S binding to hACE2 receptor by BLI.** S-protein receptor  
439 binding kinetics was determined by bio-layer interferometry (BLI) using an Octet QK384  
440 system (Pall Forté Bio, Fremont, CA). Hist-tagged human ACE2 (2  $\mu\text{g mL}^{-1}$ ) was  
441 immobilized on nickel-charged Ni-NTA biosensor tips. After baseline, SARS-CoV-2 S  
442 protein containing samples were 2-fold serially diluted over a range 4.7nM to 300 nM

443 range were allowed to associate for 600 sec followed by dissociation for an additional  
444 900 sec. Data was analyzed with Octet software HT 101:1 global curve fit.

445 **Specificity of SARS-CoV-2 S binding to hACE2 receptor by ELISA.** Ninety-six well  
446 plates were coated with 100  $\mu$ L SARS-CoV-2 spike protein ( $2 \mu\text{g mL}^{-1}$ ) overnight at  $4^{\circ}\text{C}$ .  
447 Plates were washed with phosphate buffered saline with 0.05% Tween (PBS-T) buffer  
448 and blocked with TBS Startblock blocking buffer (ThermoFisher, Scientific). Histidine-  
449 tagged hACE2 and hDPP4 receptors were 3-fold serially diluted ( $5\text{-}0.0001 \mu\text{g mL}^{-1}$ ) and  
450 added to coated wells for 2 hours at room temperature. The plates were washed with  
451 PBS-T. Optimally diluted horseradish peroxidase (HRP) conjugated anti-histidine was  
452 added and color developed by addition of and 3,3',5,5'-tetramethylbenzidine peroxidase  
453 substrate (TMB, T0440-IL, Sigma, St. Louis, MO, USA). Plates were read at an OD of  
454 450 nm with a SpectraMax Plus plate reader (Molecular Devices, Sunnyvale, CA, USA)  
455 and data analyzed with SoftMax software.  $\text{EC}_{50}$  values were calculated by 4-parameter  
456 fitting using GraphPad Prism 7.05 software

457 **Animal ethics statement.** The mouse immunogenicity studies were performed by  
458 Noble Life Sciences (Sykeville, MD). Noble Life Sciences is accredited by the  
459 Association for Assessment and Accreditation of Laboratory Animal Care (AAALACC  
460 International). All animal procedures were in accordance with NRC Guide for the Care  
461 and Use of Laboratory Animals, the Animal Welfare Act, and the CDC/NIH Biosafety in  
462 Microbiological and Biomedical Laboratories. The olive baboon (*Papio cynocephalus*  
463 *anubis*) study was performed at the University of Oklahoma Health Science Center  
464 (OUHSC). OUHSC is accredited by AAALACC International. Baboons were maintained  
465 and treated according to the Institutional Biosafety Committee guidelines. Baboon

466 experiments were approved by the Institutional Animal Care and Use Committee  
467 (IACUC) and the Institutional Biosafety Committee of OUHSC. Studies were conducted  
468 in accordance with the National Institutes of Health Guide for Care and Use of  
469 Laboratory Animals (NIH publication 8023, Revised 1978).

470 **Mouse study designs.** Female BALB/c mice (7-9 weeks old, 17-22 grams, N = 10 per  
471 group) were immunized by intramuscular (IM) injection with a single dose (study day 14)  
472 or two doses spaced 14-days apart (study day 0 and 14) containing a dose range (0.01,  
473 0.1, 1.0, or 10  $\mu$ g) of NVX-CoV2373 with 5  $\mu$ g saponin-based Matrix-M™ adjuvant  
474 (Novavax, AB, Uppsala, SE). A separate group (n =10) received two doses of 10  $\mu$ g  
475 NVX-CoV2373 without adjuvant. A placebo group served as a non-immunized control.  
476 Serum was collected for analysis on study days -1, 13, 21, and 28. Vaccinated and  
477 control animals were intranasally challenged with SARS-CoV-2 42-days following one or  
478 two immunizations (study day 56).

479 To assess the T cell response mediated by Matrix-M adjuvant, groups of female  
480 BALB/c mice (N = 6 per group) were immunized IM with 10  $\mu$ g NVX-CoV2373 with and  
481 without 5  $\mu$ g Matrix-M adjuvant in 2 doses spaced 21-days apart. Spleens were  
482 collected 7-days after the second immunization (study day 28). A non-vaccinated group  
483 (N = 3) served as a control.

484 **Baboon study design.** Ten adult baboons (10-16 years of age) were randomized into 4  
485 groups of 2-3/group and immunized by IM injection with 1, 5 or 25  $\mu$ g NVX-CoV2373  
486 with 50  $\mu$ g Matrix-M adjuvant. A separate group was immunized with 25  $\mu$ g NVX-  
487 CoV2373 without adjuvant. Animals were vaccinated with 2-doses spaced 21-days  
488 apart. Serum was collected on study days 0, 21, 28 and 35. For T cell analysis,

489 peripheral blood mononuclear cells (PBMCs) were collected 7-days after the second  
490 immunization (study day 28). Subsequent to the start of the study one animal tested  
491 positive for STLV and was therefore dropped from the study.

492 **SARS-CoV-2 challenge in mice.** Mice were transduced intranasally with  $2.5 \times 10^8$  pfu  
493 Ad/CMVhACE2 (VVC-McCray-7580, University of Iowa Vector Core) 38-days after the  
494 second vaccination. At four days post infection, mice were anaesthetized by  
495 intraperitoneal injection 50  $\mu$ L of a mix of xylazine (0.38 mg/mouse) and ketamine (1.3  
496 mg/mouse) diluted in phosphate buffered saline (PBS). Mice were intranasally  
497 inoculated with  $1.5 \times 10^5$  pfu of SARS-CoV-2 in 50  $\mu$ L divided between nares.  
498 Challenged mice were weighed on day of infection and daily for up to 7 days post  
499 infection. At days 4- and 7-days post infection, 5 mice were sacrificed from each  
500 vaccination and control group, and lungs were harvested to determine for titer by a  
501 plaque assay and prepared for histological scoring.

502 **SARS-CoV-2 plaque assay.** SARS-CoV-2 lung titers were quantified by homogenizing  
503 harvested lungs in PBS (Quality Biological Inc.) using 1.0 mm glass beads (Sigma  
504 Aldrich) and a Beadruptor (Omini International Inc.). Homogenates were added to Vero  
505 E6 near confluent cultures and SARS-CoV-2 virus titers determined by counting plaque  
506 forming units (pfu) using a 6-point dilution curve.

507 **Anti-SARS-CoV-2 spike IgG by ELISA.** An ELISA was used to determine anti-SARS-  
508 CoV-2 S IgG titers. Briefly, 96 well microtiter plates (ThermoFischer Scientific,  
509 Rochester, NY, USA) were coated with  $1.0 \mu\text{g mL}^{-1}$  of SARS-CoV-2 spike protein.  
510 Plates were washed with PBS-T and blocked with TBS Startblock blocking buffer

511 (ThermoFisher, Scientific). Mouse, baboon or human serum samples were serially  
512 diluted ( $10^{-2}$  to  $10^{-8}$ ) and added to the blocked plates before incubation at room  
513 temperature for 2 hours. Following incubation, plates were washed with PBS-T and  
514 HRP-conjugated goat anti-mouse IgG or goat anti-human IgG (Southern Biotech,  
515 Birmingham, AL, USA) added for 1 hour. Plates were washed with PBS-T and 3,3',5,5'-  
516 tetramethylbenzidine peroxidase substrate (TMB, T0440-IL, Sigma, St Louis, MO, USA)  
517 was added. Reactions were stopped with TMB stop solution (ScyTek Laboratories, Inc.  
518 Logan, UT). Plates were read at OD 450 nm with a SpectraMax Plus plate reader  
519 (Molecular Devices, Sunnyvale, CA, USA) and data analyzed with SoftMax software.  
520  $EC_{50}$  values were calculated by 4-parameter fitting using SoftMax Pro 6.5.1 GxP  
521 software. Individual animal anti-SARS-CoV-2 S IgG titers and group geometric mean  
522 titers (GMT) and 95% confidence interval ( $\pm$  95% CI) were plotted GraphPad Prism 7.05  
523 software.

524 **ACE2 receptor blocking antibodies.** ACE2 receptor blocking antibodies were  
525 determined by ELISA. Ninety-six well plates were coated with  $1.0 \mu\text{g mL}^{-1}$  SARS-CoV-2  
526 S protein overnight at  $4^{\circ}\text{C}$ . Serially diluted serum from groups of immunized mice,  
527 baboons or humans were and added to coated wells and incubated for 2 hours at room  
528 temperature. After washing,  $30 \text{ ng mL}^{-1}$  of histidine-tagged hACE or hDPP4 was added  
529 to wells for 1 hour at room temperature. HRP-conjugated anti-histidine IgG was added  
530 followed by washing prior to addition of TMB substrate. Plates were read at OD 450 nm  
531 with a SpectraMax plus plate reader (Molecular Devices, Sunnyvale, CA, USA) and  
532 data analyzed with SoftMax software. Serum dilution resulting in a 50% inhibition of



533 receptor binding was used to calculate titer determined using 4-parameter fitting with  
534 GraphPad Prism 7.05 software.

535 **SARS-CoV-2 neutralization assay.** SARS-CoV-2 was handled in a select agent  
536 ABSL3 facility at the University of Maryland, School of Medicine. Mouse or baboon sera  
537 were diluted 1:20 in Vero E6 cell growth media and further diluted 1:2 to 1:40960.  
538 SARS-CoV-2 (MOI of 0.01 pfu per cell) was added and the mixture incubated for 60 min  
539 at 37°C. Vero E6 media was used as negative control. The inhibitory capacity of each  
540 serum dilution was assessed for cytopathic effect (CPE). The endpoint titer was  
541 reported as the dilution that blocked 100% of CPE at 3 days post infection.

542 **ELISPOT assay.** Murine IFN- $\gamma$  and IL-5 ELISPOT assays were performed following  
543 manufacturer's procedures for mouse IFN- $\gamma$  and IL-5 ELISPOT kit (Mabtech, Cincinnati,  
544 OH). Briefly,  $3 \times 10^5$  splenocytes in a volume of 200  $\mu$ L were stimulated with NVX-  
545 CoV2373 protein or peptide pools (PP) of 15-mer peptides with 11 overlapping amino  
546 acids covering the entire spike protein sequence (JPT, Berlin, Germany) in plates that  
547 were pre-coated with anti-IFN- $\gamma$  or anti-IL-5 antibodies. Each stimulation condition was  
548 carried out in triplicate. Assay plates were incubated overnight at 37°C in a 5% CO<sub>2</sub>  
549 incubator and developed using BD ELISPOT AEC substrate set (BD Biosciences, San  
550 Diego, CA). Spots were counted and analyzed using an ELISPOT reader and  
551 Immunospot software (Cellular Technology, Ltd., Shaker Heights, OH). The number of  
552 IFN- $\gamma$  or IL-5 secreting cells was obtained by subtracting the background number in the  
553 medium controls. Data shown in the graph are the average of triplicate wells.

554 Similarly, Baboon IFN- $\gamma$  and IL-4 assays were carried out using NHP IFN- $\gamma$  and Human  
555 IL-4 assay kit from Mabtech using PBMC collected at day 7 following the second  
556 immunization (day 28).

557 **Surface and intracellular cytokine staining.** For surface staining, murine splenocytes  
558 were first incubated with an anti-CD16/32 antibody to block the Fc receptor. To  
559 characterize T follicular helper cells (Tfh), splenocytes were incubated with the following  
560 antibodies or dye: BV650-conjugated anti-CD3, APC-H7-conjugated anti-CD4, FITC-  
561 conjugated anti-CD8, Percp-cy5.5-conjugated anti-CXCR5, APC-conjugated anti-PD-1,  
562 Alexa Fluor 700-conjugated anti-CD19, PE-conjugated anti-CD49b (BD Biosciences,  
563 San Jose, CA) and the yellow LIVE/DEAD<sup>®</sup> dye (Life Technologies, NY). To  
564 stain germinal center (GC) B cells, splenocytes were labeled with FITC-conjugated anti-  
565 CD3, PerCP-Cy5.5-conjugated anti-B220, APC-conjugated anti-CD19, PE-cy7-  
566 conjugated anti-CD95, and BV421-conjugated anti-GL7 (BD Biosciences) and the  
567 yellow LIVE/DEAD<sup>®</sup> dye (Life Technologies, NY).

568 For intracellular cytokine staining (ICCS) of murine splenocytes, cells were cultured  
569 in a 96-well U-bottom plate at  $2 \times 10^6$  cells per well. The cells were stimulated with  
570 NVX-CoV2373 or pools of a 15-mer peptide pool (PP) as described above (JPT, Berlin,  
571 Germany). The plate was incubated 6 h at 37°C in the presence of BD GolgiPlug<sup>™</sup> and  
572 BD GolgiStop<sup>™</sup> (BD Biosciences). Cells were labeled with murine antibodies against  
573 CD3 (BV650), CD4 (APC-H7), CD8 (FITC), CD44 (Alexa Fluor 700), and CD62L (PE)  
574 (BD Pharmingen, CA) and the yellow LIVE/DEAD<sup>®</sup> dye. After fixation with  
575 Cytofix/Cytoperm (BD Biosciences), cells were incubated with PerCP-Cy5.5-conjugated  
576 anti-IFN- $\gamma$ , BV421-conjugated anti-IL-2, PE-cy7-conjugated anti-TNF- $\alpha$ , and APC-

577 conjugated anti-IL-4 (BD Biosciences). All stained samples were acquired using a LSR-  
578 Fortessa flow cytometer (Becton Dickinson, San Jose, CA) and the data were analyzed  
579 with FlowJo software version Xv10 (Tree Star Inc., Ashland, OR).

580 For ICCS, baboon PBMCs were collected 7 days after the second immunization (day  
581 28) and stimulated as described above with NVX-CoV2373. Cells were labelled with  
582 human/NHP antibodies BV650-conjugated anti-CD3, APC-H7-conjugated anti-CD4,  
583 APC-conjugated anti-CD8, BV421-conjugated anti-IL-2, PerCP-Cy5.5-conjugated anti-  
584 IFN- $\gamma$ , PE-cy7-conjugated anti-TNF- $\alpha$  (BD Biosciences), and the yellow  
585 LIVE/DEAD<sup>®</sup> dye.

586 **Histopathology.** Mice were euthanized at 4- and 7-days following SARS-CoV-2  
587 challenge. The lungs were fixed with 10% formalin, and sections were stained with H&E  
588 for histological examination. Slides were examined in a blinded fashion for total  
589 inflammation, periarteriolar, and peribronchiolar inflammation and epithelial cell  
590 denuding.

591 **COVID-19 convalescent serum.** Convalescent serum samples were provided by Dr.  
592 Pedro A Piedra (Baylor College of Medicine, Houston, TX, USA). Samples were  
593 collected from COVID-19 patients 18-79 years of age 4-6 weeks after testing positive for  
594 SARS CoV-2. Symptoms ranged from asymptomatic, mild to moderate symptoms, to  
595 severe symptoms requiring hospitalization. Sera were analyzed for anti-SARS-CoV-2 S  
596 IgG and hACE2 receptor inhibiting antibody levels.

597 **Statistical analysis.** Statistical analyses were performed with GraphPad Prism 7.05  
598 software (La Jolla, CA). Serum antibody titers were plotted for individual animals and

599 the geometric mean titer (GMT) and 95% confidence interval (95% CI) or the means  $\pm$   
600 SEM as indicated in the figure. T-test was used to determine differences between  
601 paired groups. Weight change between immunized and placebo groups was determined  
602 for each day using a t-test. P-values  $\leq 0.05$  were considered as statistically significant.

603

## 604 References

- 605 1. Xu J et al. Systematic Comparison of Two Animal-to-Human Transmitted Human  
606 Coronaviruses: SARS-CoV-2 and SARS-CoV. *Viruses*. **12**, 244 (2020). doi:  
607 [10.3390/v1202024](https://doi.org/10.3390/v1202024).
- 608 2. Lai CC, Shih TP, Ko WC, Tang HJ, Hsueh PR. Severe acute respiratory syndrome  
609 coronavirus 2 (SARS-CoV-2) and coronavirus disease-2019 (COVID-19): The  
610 epidemic and the challenges. *Int J Antimicrob Agents*. **17**, 105924 (2020). doi:  
611 [10.1016/j.ijantimicag.2020.105924](https://doi.org/10.1016/j.ijantimicag.2020.105924).
- 612 3. Huang R, Liu M, Ding Y. Spatial-temporal distribution of COVID-19 in China and its  
613 prediction: A data-driven modeling analysis. *J Infect Dev Ctries*. **14**, 246-253  
614 (2020). doi: [10.3855/jidc.12585](https://doi.org/10.3855/jidc.12585).
- 615 4. Corey L, Mascola JR, Fauci AS, Collins FS. A strategic approach to COVID-19  
616 vaccine R&D. *Science*. **368**, 948-950 (2020). doi: [10.1126/science.abc5312](https://doi.org/10.1126/science.abc5312).
- 617 5. Walls AC et al. Tectonic conformational changes of a coronavirus spike  
618 glycoprotein promote membrane fusion. *Proc Natl Acad Sci U S A*. **114**, 11157-  
619 11162 (2017). doi: [10.1073/pnas.1708727114](https://doi.org/10.1073/pnas.1708727114).
- 620 6. Ding Y et al. The clinical pathology of severe acute respiratory syndrome (SARS):  
621 a report from China. [http://www.J Pathol](http://www.JPathol). **200**, 282-289 (2003). doi:  
622 [10.1002/path.1440](https://doi.org/10.1002/path.1440).
- 623 7. Tang XC et al. Identification of human neutralizing antibodies against MERS-CoV  
624 and their role in virus adaptive evolution. *Proc Natl Acad Sci U S A*. **111**, E2018-  
625 2026 (2014). doi: [10.1073/pnas.1402074111](https://doi.org/10.1073/pnas.1402074111).
- 626 8. Li F. et al. Structure, Function, and Evolution of Coronavirus Spike Proteins. *Annu*  
627 *Rev Virol*. **3**, 237-261 (2016). doi: [10.1146/annurev-virology-110615-042301](https://doi.org/10.1146/annurev-virology-110615-042301).
- 628 9. Bosch BJ, van der Zee R, de Haan CA, Rottier PJ. The coronavirus spike protein is  
629 a class I virus fusion protein: structural and functional characterization of the fusion  
630 core complex. *J Virol*. **77**, 8801-8811 (2003). doi: [10.1128/jvi.77.16.8801-  
631 8811.2003](https://doi.org/10.1128/jvi.77.16.8801-8811.2003).
- 632 10. Coutard B, Valle C, de Lamballerie X, Canard B, Seidah NG, Decroly E. The spike  
633 glycoprotein of the new coronavirus 2019-nCoV contains a furin-like cleavage site  
634 absent in CoV of the same clade. *Antiviral Res*. **176**, 04742 (2020). doi:  
635 [10.1016/j.antiviral.2020.104742](https://doi.org/10.1016/j.antiviral.2020.104742).
- 636 11. Pallesen J et al. Immunogenicity and structures of a rationally designed prefusion  
637 MERS-CoV spike antigen. *Proc Natl Acad Sci U S A*. **2017**, 114, E7348-E7357.  
638 doi: [10.1073/pnas.1707304114](https://doi.org/10.1073/pnas.1707304114).

- 639 12. Walls AC, Park YJ, Tortorici MA, Wall A, McGuire AT, Veerler D. Structure,  
640 Function, and Antigenicity of the SARS-CoV-2 Spike Glycoprotein. *Cell*. **181**, 281-  
641 292 (2020). <https://doi.org/10.1016/j.cell.2020.02.058>
- 642 13. Raj VS et al. Dipeptidyl peptidase 4 is a functional receptor for the emerging  
643 human coronavirus-EMC. *Nature*. **495**, 251-254 (2013). [doi: 10.1038/nature12005](https://doi.org/10.1038/nature12005).
- 644 14. Millet JK, Whittaker GR. Host cell entry of Middle East respiratory syndrome  
645 coronavirus after two-step, furin-mediated activation of the spike protein *Proc Natl  
646 Acad Sci U S A*. **111**, 15214-9 (2014). [doi: 10.1073/pnas.1407087111](https://doi.org/10.1073/pnas.1407087111).
- 647 15. Belouzard S, Chu VC, Whittaker GR. Activation of the SARS coronavirus spike  
648 protein via sequential proteolytic cleavage at two distinct sites. *Proc Natl Acad Sci  
649 U S A*. **106**, 5871-5876 (2009). [doi: 10.1073/pnas.0809524106](https://doi.org/10.1073/pnas.0809524106).
- 650 16. Li W et al. Angiotensin-converting enzyme 2 is a functional receptor for the SARS  
651 coronavirus. *Nature*. **426**, 450-454 (2003). [doi: 10.1038/nature02145](https://doi.org/10.1038/nature02145).
- 652 17. Lander GC et al. Appion: an integrated, database-driven pipeline to facilitate EM  
653 image processing. *J Struct Biol*. **166**, 95-102 (2009).
- 654 18. Sorzano CO et al. XMIPP: a new generation of an open-source image processing  
655 package for electron microscopy. *J Struct Biol*. **148**, 194-204 (2004).
- 656 19. Wrapp D, et al. Cryo-EM structure of the 2019-nCoV spike in the prefusion  
657 conformation. *Science*. **367**, 1260-1263 (2020). [doi: 10.1126/science.abb2507](https://doi.org/10.1126/science.abb2507).
- 658 20. Ou X et al. Characterization of spike glycoprotein of SARS-CoV-2 on virus entry  
659 and its immune cross-reactivity with SARS-CoV. *Nat Commun*. **11**, 1620 (2020).  
660 [doi: 10.1038/s41467-020-15562-9](https://doi.org/10.1038/s41467-020-15562-9).
- 661 21. Shinde V et al. Improved Titers against Influenza Drift Variants with a Nanoparticle  
662 Vaccine. *N Engl J Med*. **378**, 2346-2348 (2018). [doi: 10.1056/NEJMc1803554](https://doi.org/10.1056/NEJMc1803554).
- 663 22. Fries L et al. A Randomized, Blinded, Dose-Ranging Trial of an Ebola Virus  
664 Glycoprotein (EBOV GP) Nanoparticle Vaccine with Matrix-M™ Adjuvant in  
665 Healthy Adults. *J Infect Dis*. jiz518 (2019). <https://doi.org/10.1093/infdis/jiz518>.
- 666 23. Liu L et al. Anti-spike IgG causes severe acute lung injury by skewing macrophage  
667 responses during acute SARS-CoV infection. *JCI Insight*. **4**, e123158 (2019). [doi:  
668 10.1172/jci.insight.123158](https://doi.org/10.1172/jci.insight.123158).
- 669 24. Gralinski LE et al. Complement Activation Contributes to Severe Acute Respiratory  
670 Syndrome Coronavirus Pathogenesis. *mBio*. **9**, e01753 (2018). [doi:  
671 10.1128/mBio.01753-18](https://doi.org/10.1128/mBio.01753-18).

- 672 25. Liu YV et al. Chimeric severe acute respiratory syndrome coronavirus (SARS-CoV)  
673 S glycoprotein and influenza matrix 1 efficiently form virus-like particles (VLPs) that  
674 protect mice against challenge with SARS-CoV. *Vaccine*. **29**, 6606-6613 (2011).  
675 [doi: 10.1016/j.vaccine.2011.06.111](https://doi.org/10.1016/j.vaccine.2011.06.111).
- 676 26. Coleman CM et al. Purified coronavirus spike protein nanoparticles induce  
677 coronavirus neutralizing antibodies in mice. *Vaccine*. **32**, 3169-3174 (2014). [doi:](https://doi.org/10.1016/j.vaccine.2014.04.016)  
678 [10.1016/j.vaccine.2014.04.016](https://doi.org/10.1016/j.vaccine.2014.04.016).
- 679 27. Coleman CM et al. MERS-CoV spike nanoparticles protect mice from MERS-CoV  
680 infection. *Vaccine*. **35**, 1586-1589 (2017). [doi: 10.1016/j.vaccine.2017.02.012](https://doi.org/10.1016/j.vaccine.2017.02.012).
- 681

682 **End Notes**

683 **Funding:** Support of this work was provided by Novavax, Inc. The funder participated in  
684 the study design, data collection and analysis, decision to publish, and preparation of  
685 the manuscript.

686 **Declaration of competing interest:** Authors JHT, NP, HZ, ADP, JN, MGX, BZ, KJ,  
687 SM, RK, MW, WM, SKS, SE, MJM, SB, CJW, LF, KLB, LS, GG, LE and GS are current  
688 or past employees of Novavax, Inc., a for-profit organization, and these authors own  
689 stock or hold stock options. These interests do not alter the authors' adherence to  
690 policies on sharing data and materials. MBF, RH, SW, JL, HH, PAP and JP declare no  
691 competing interests.

692 **Authors' contributions:** GS, GG, JHT, NP, RH, HZ, MGX, ADP, MJM, MBF and LE  
693 contributed to conceptualization of experiments, generation of data and analysis, and  
694 interpretation of the results. JHT, RH, NP, SW, HH, JL, JN, BZ, KJ, SM, RK, MW, WM,  
695 SKS, BE, SB, CJW, HZ performed experiments. ADP, MGX, JP coordinated projects.  
696 MBF, ADP, MJM, LF, PAP, KLB, LS, GG, GS, LE contributed to drafting and making  
697 critical revisions with the help of others.



698 **Figure 1.**

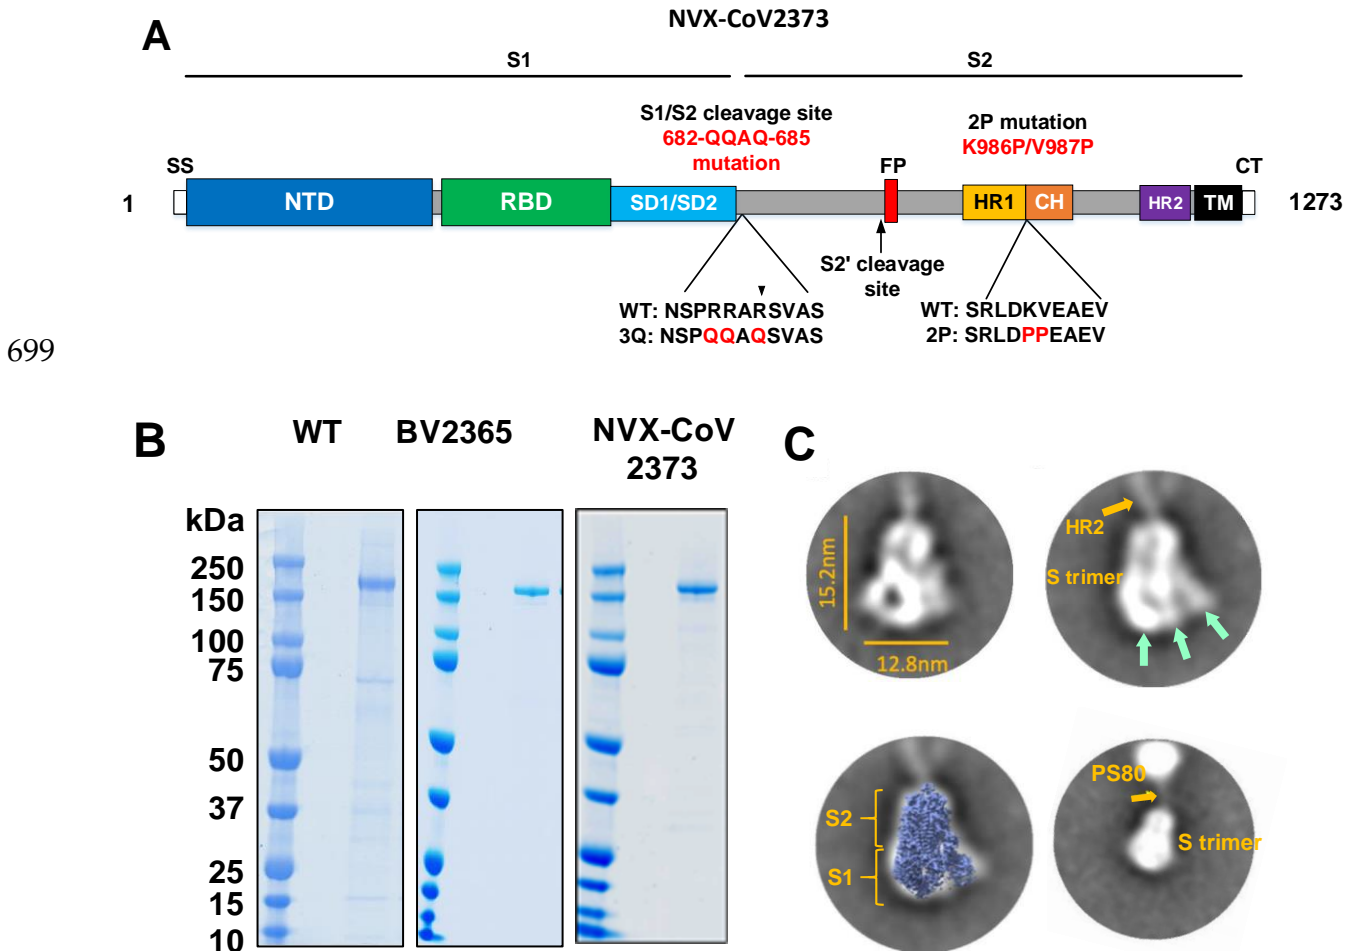

700

701 **Fig. 1. SARS-CoV-2 spike glycoprotein constructs.** (A) Linear diagram of the full-  
702 length SARS-CoV-2 spike (S) protein showing the S1 and S2 subunits. Structural  
703 elements include a cleavable signal sequence (SS, white), N-terminal domain (NTD,  
704 blue), receptor binding domain (RBD, green), subdomains 1 and 2 (SD1/SD2, light  
705 blue), fusion peptide (FP, red), heptad repeat 1 (HR1, yellow), central helix (CH, brown),  
706 heptad repeat 2 (HR2, purple), transmembrane domain (TM, black) and cytoplasmic tail  
707 (CT, white). The native furin cleavage site was mutated (RRAR→QQAQ) to be protease  
708 resistant to generate the full-length BV2365 variant. The BV2365 was further stabilized

709 by introducing two proline (2P) substitutions at positions K986P and V987P to produce  
710 the double mutant NVX-CoV2373. **(B)** Representative reduced SDS-PAGE gel of  
711 purified full-length wild-type (WT), BV2365, and NVX-CoV2373. **(C)** Transmission  
712 electron microscopy and 2D class averaging of NVX-CoV2373. Representative class  
713 averages of NVX-CoV2373 S-trimers showing well-defined triangle shaped particles  
714 with a length of 15 nm and a width of 12.8 nm (upper left). The S1 apical surface with  
715 the N-terminal receptor and receptor-binding domain (NTD/RBD) is indicated by green  
716 arrows. Faint protrusions (orange arrow) extending from the tip of the trimers were  
717 evident and appear to correspond to the S2 HR2 domain (upper right). Class average  
718 images showing a good fit of NVX-CoV2373 S-trimer with cryoEM solved structure of  
719 the SARS-CoV-2 trimeric spike protein ectodomain (EMD ID: 21374) overlaid on the 2D  
720 image (lower left). 2D class averaging using a larger box sized showing 2D class  
721 average image with the less well-defined HR2 (orange arrow) anchoring the S-trimer to  
722 polysorbate 80 (PS80) micelle by the C-terminal TM (lower right).

723 **Figure 2.**

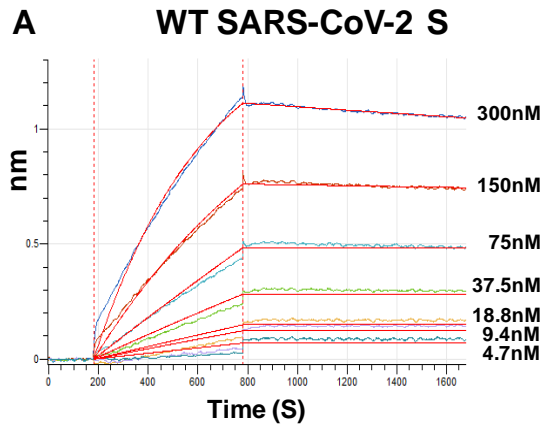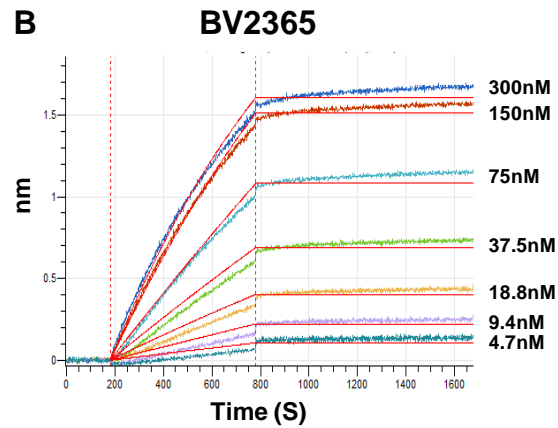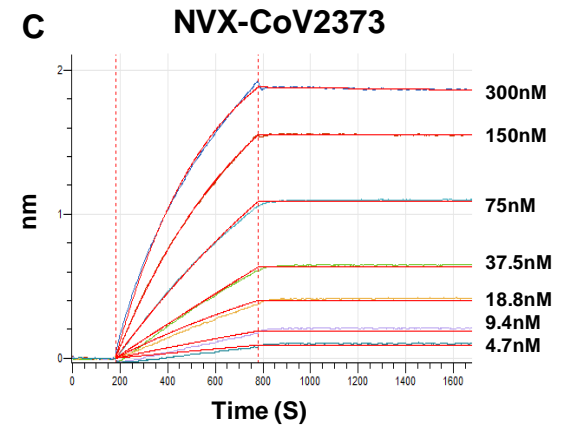

724

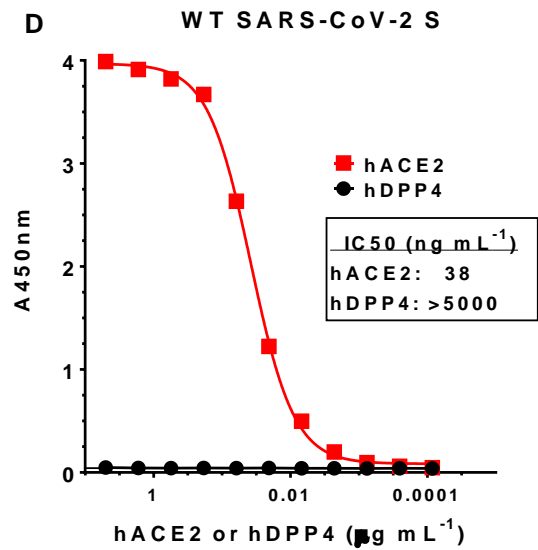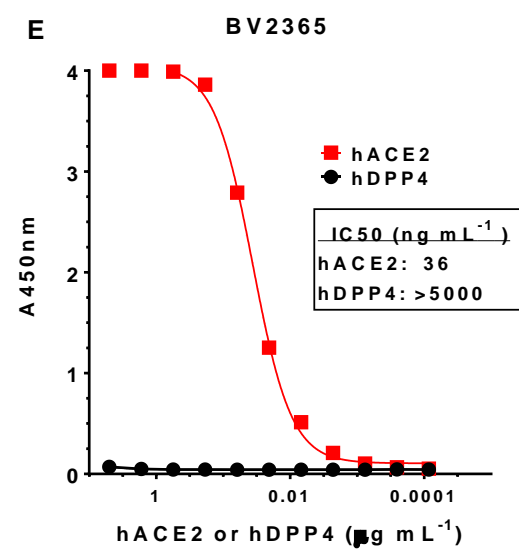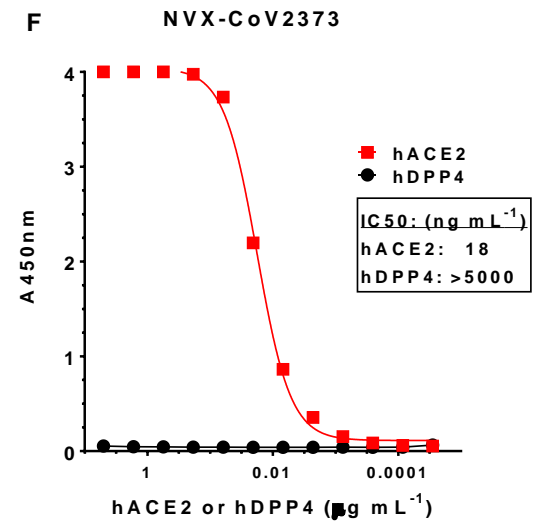

725

726 **Fig. 2. Kinetics and specificity of SARS-CoV-2 S protein binding to hACE2**  
727 **receptor determined by bio-layer interferometry (BLI) and ELISA.** BLI sensorgram  
728 showing the binding of **(A)** wild-type (WT), **(B)** BV2365, and **(C)** NVX-CoV2373 spike  
729 proteins to histidine-tagged hACE2 receptor immobilized on a Ni-NTA biosensor tip.  
730 Data are shown as colored lines at different concentrations of spike protein. Red lines  
731 are the best fit of the data. **(D)** WT-SARS-CoV-2 S, **(E)** BV2365, and **(F)** NVX-CoV2373  
732 demonstrated by binding to hACE2 receptor but failing to bind hDPP-4 as determined  
733 by ELISA.

734

735 **Figure 3.**

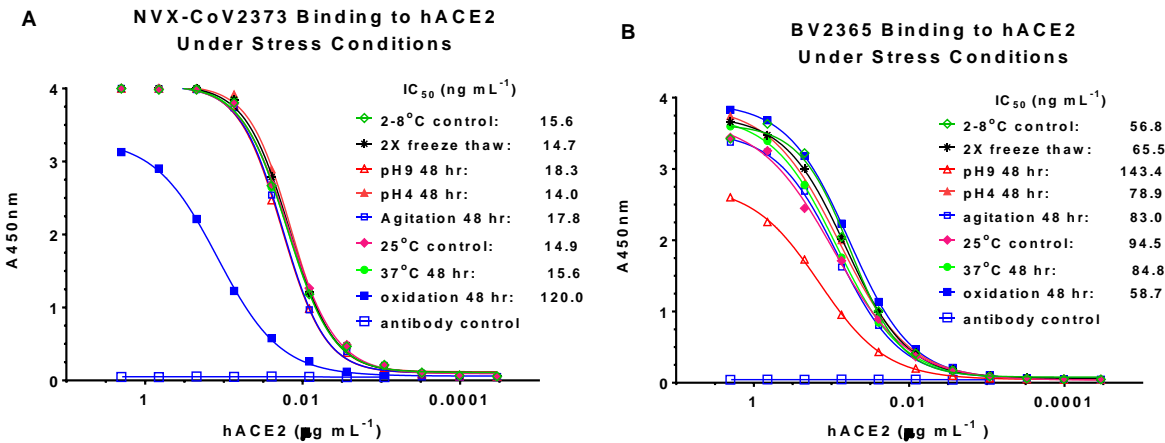

736

737 **Fig. 3. Stability of SARS-CoV-2 variants under stress conditions.** The hACE2  
738 receptor binding ELISA method was used to assess the structural integrity of BV2365  
739 and NVXCoV2373 under stressed conditions. **(A)** NVXCoV2373 and **(B)** BV2365 were  
740 exposed to repeat freeze-thaw cycles, pH extremes, agitation, elevated temperatures,  
741 and oxidation for extended periods as indicated. Treated samples were immobilized on  
742 96-well plates then incubated with serially diluted (2- 0.0001µg mL<sup>-1</sup>) histidine-tagged  
743 hACE2. Bound receptor was detected with HRP-conjugated rabbit anti-histidine IgG.

744

745 **Figure 4.**

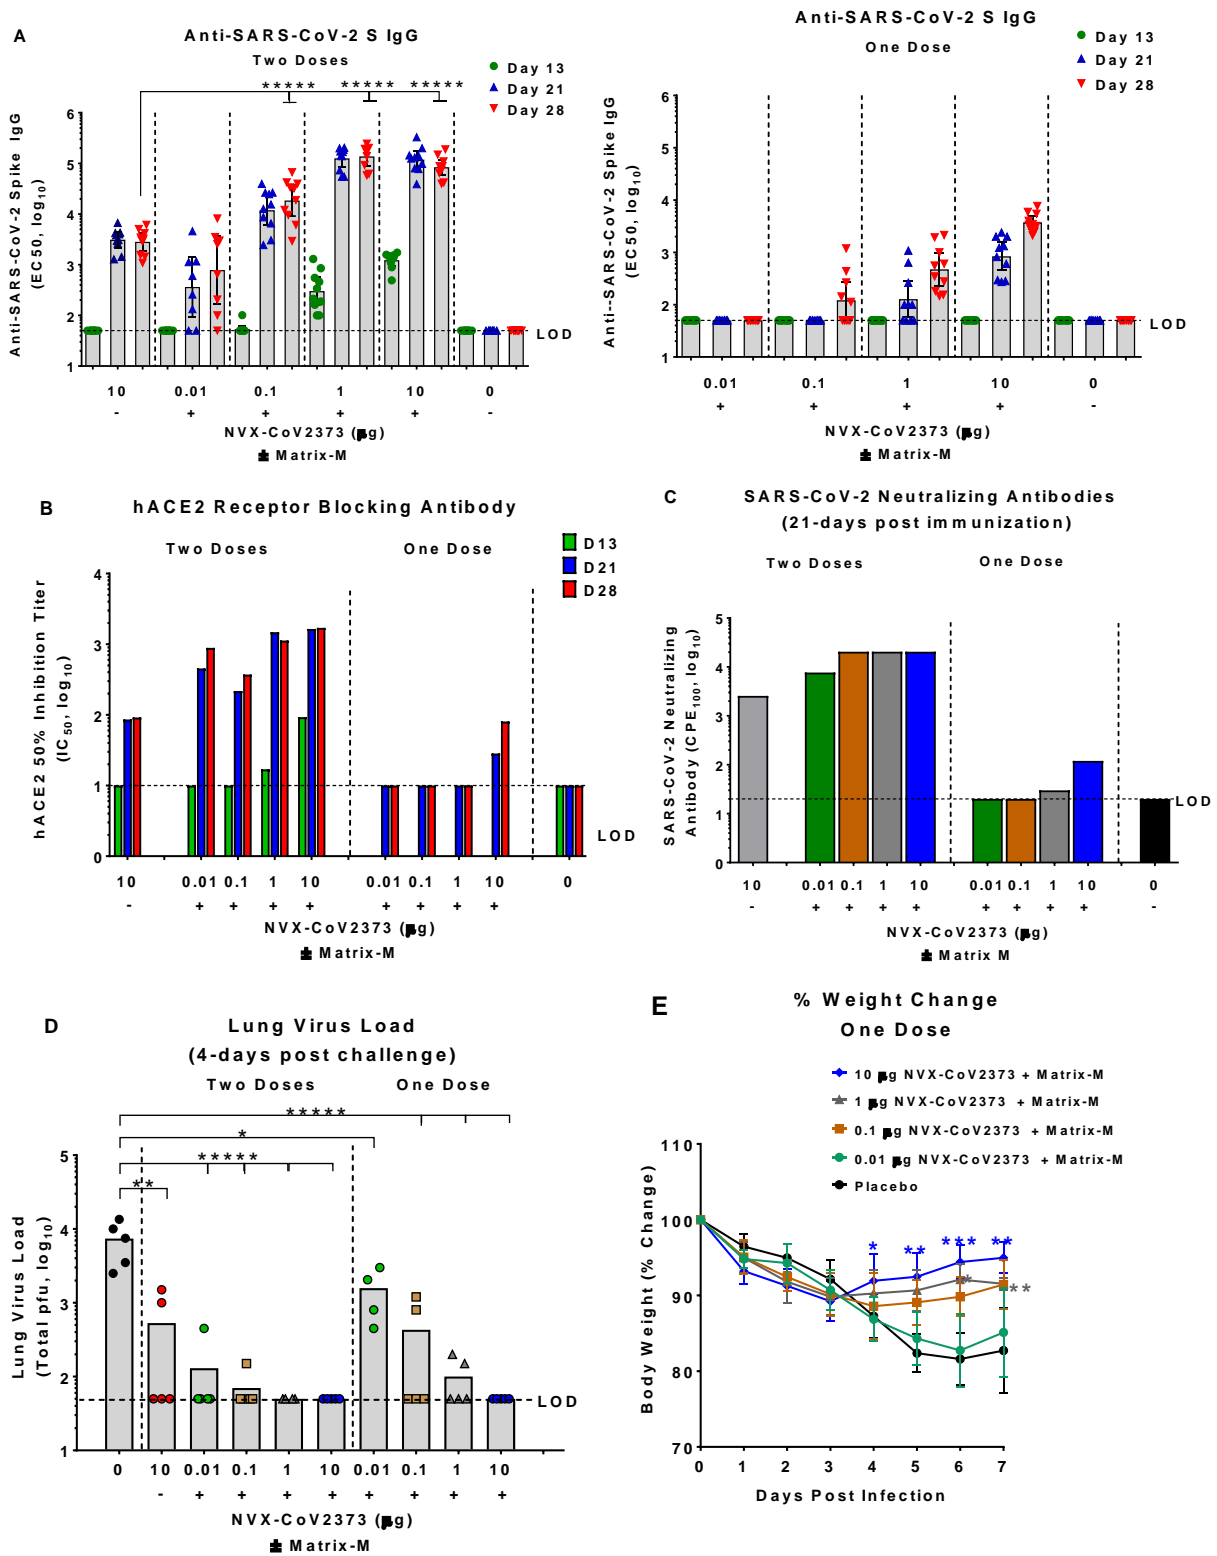

746

747

748

749

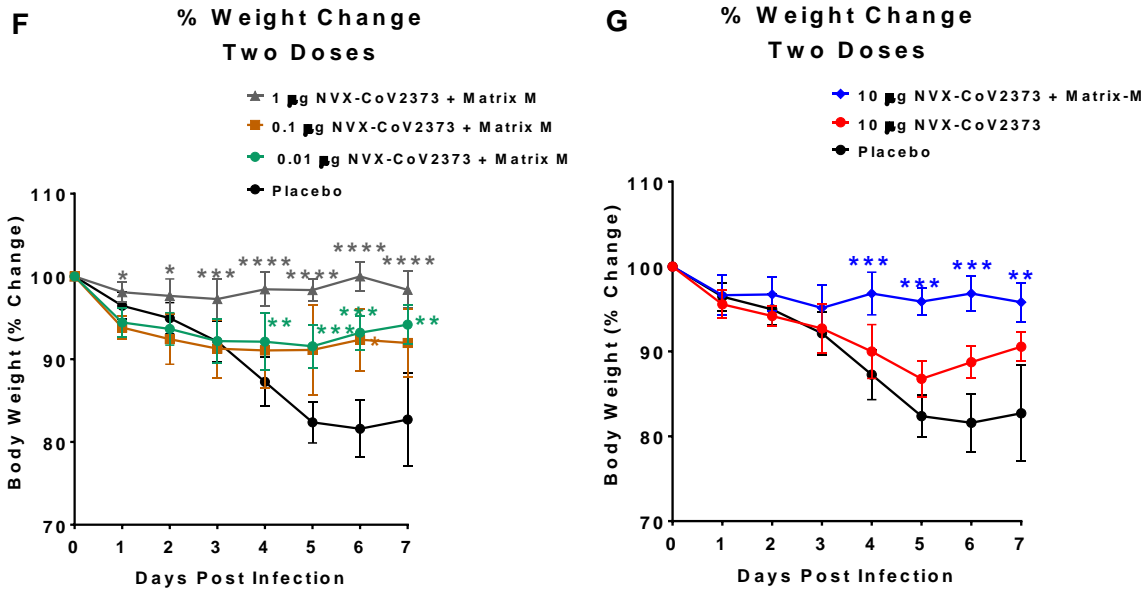

750

751 **Fig. 4. Immunogenicity of NVX-CoV2373 vaccine and protection against SARS-**

752 **CoV-2 infection in mice.** Groups of mice (N =10 per group) were immunized with a

753 single priming dose (study day 14) or a prime/boost spaced 14 days apart (study day 0

754 and 14) over a low dose range (0.01-10 µg) NVX-CoV2373 with Matrix-M adjuvant (5

755 µg). (A) Anti-SARS-CoV-2 S IgG results are plotted as the geometric mean titer (GMT

756 and 95% CI). (B) Human ACE2 receptor blocking antibodies in pooled serum (N =

757 10/group). (C) SARS-CoV-2 virus neutralizing antibody titers in pooled serum (N =

758 10/group). Six weeks following the booster immunization (study day 52) mice were

759 transduced intranasally with  $2.5 \times 10^8$  pfu Ad/CMVhACE2. At 4-days post infection mice

760 were intranasally challenged with  $1.5 \times 10^5$  pfu of SARS-CoV-2. Animals were monitored

761 daily for up to 7-days post infection. (D) Infectious virus load in lung homogenates at 4-

762 days post SARS-CoV-2 challenge. Bars represent the mean titers (N = 5 per group). (E,

763 **F, G)** Weight change following nasal challenge with SARS-CoV-2. Results are plotted

764 as the mean  $\pm$  SD (N = 5-10/time point). Data plotted as the mean  $\pm$  SD. T-test was

765 used to compare differences in weight change of vaccinated groups to the non-  
766 vaccinated placebo control group. \* $p \leq 0.05$ , \*\* $p \leq 0.001$ , \*\*\* $p \leq 0.0001$ , \*\*\*\* $p \leq 0.000001$ .

767 Limit of detection (LOD).

768

769



770 **Figure 5.**

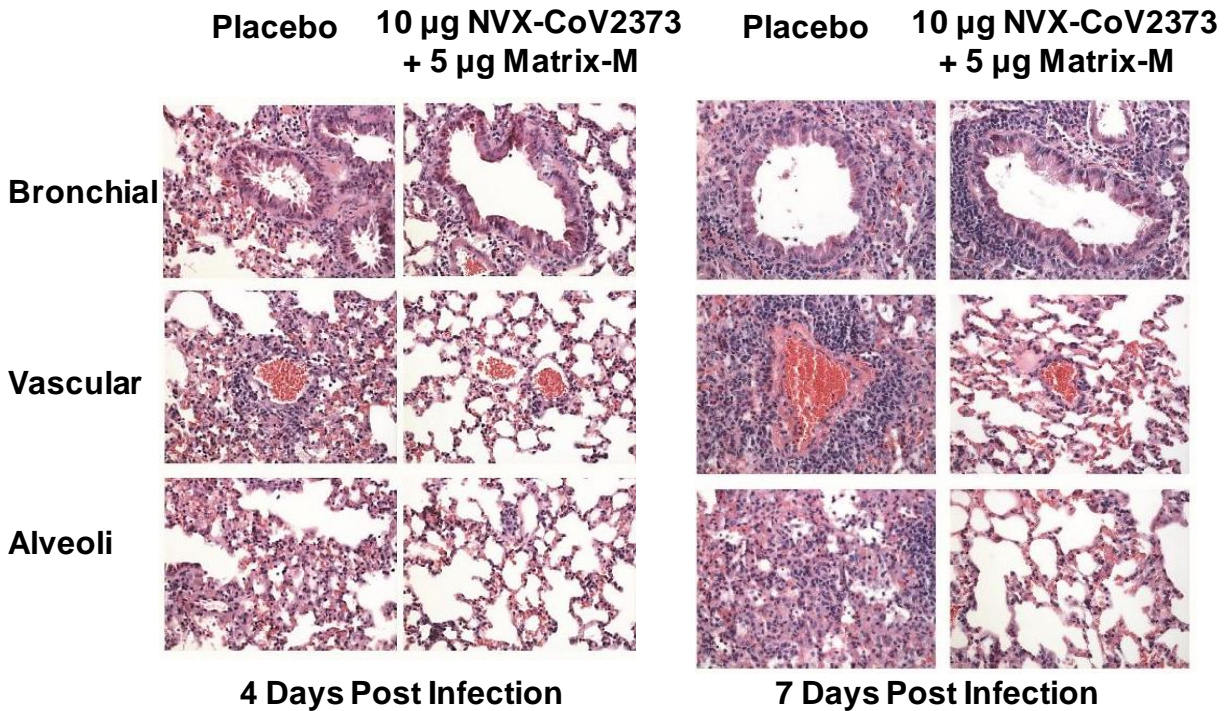

771

772 **Fig. 5. Representative histopathology of lungs from NVX-CoV2373 vaccinated**

773 **and Ad/CMV/hACE2 transduced mice challenged with SARS-CoV-2.** Groups of

774 mice were vaccinated with NVX-CoV2373 with Matrix-M adjuvant with 2-doses spaced

775 14 days apart. Mice were intranasally infected with Ad/CMV/hACE2 31-days following

776 the first immunization. On study day 56, mice were challenged with  $1 \times 10^5$  pfu/mouse

777 of SARS-CoV-2 (WA1 strain). Lungs were collected 4- and 7-days post infection.

778 Representative placebo control animal at 4-days post infection showing denuding of

779 bronchial epithelium with marked thickening of the alveolar septa surrounded by a

780 mixed inflammatory cells. Diffuse periarteriolar cuffing throughout the lung consisting of

781 a neutrophils and macrophages. At 7-days post infection, peribronchiolar inflammation

782 and periarteriolar cuffing was markedly increased. Lungs from NVX-CoV2373

783 vaccinated animals had little or no epithelial cell sloughing or infection within large and

784 small bronchi at day 4 and 7 post infection. There was no evidence of exacerbated lung  
785 inflammation in NVX-CoV2373 immunized animals.

786

787 **Figure 6.**

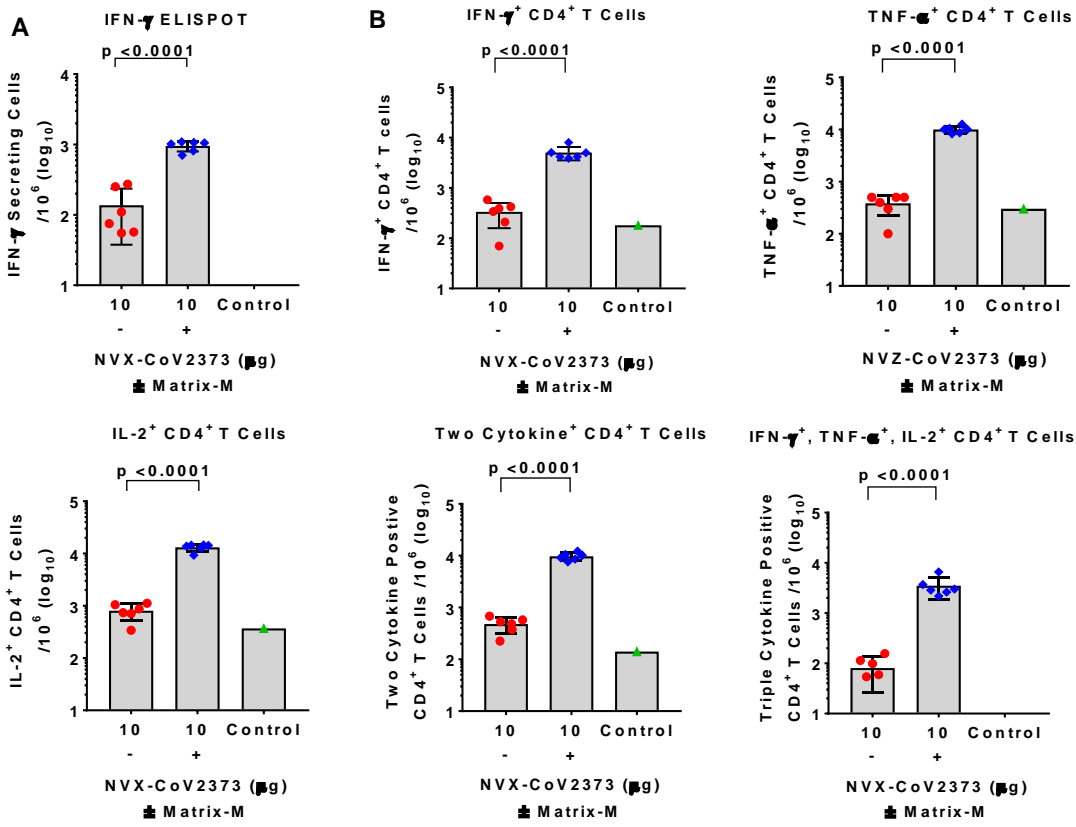

788

789

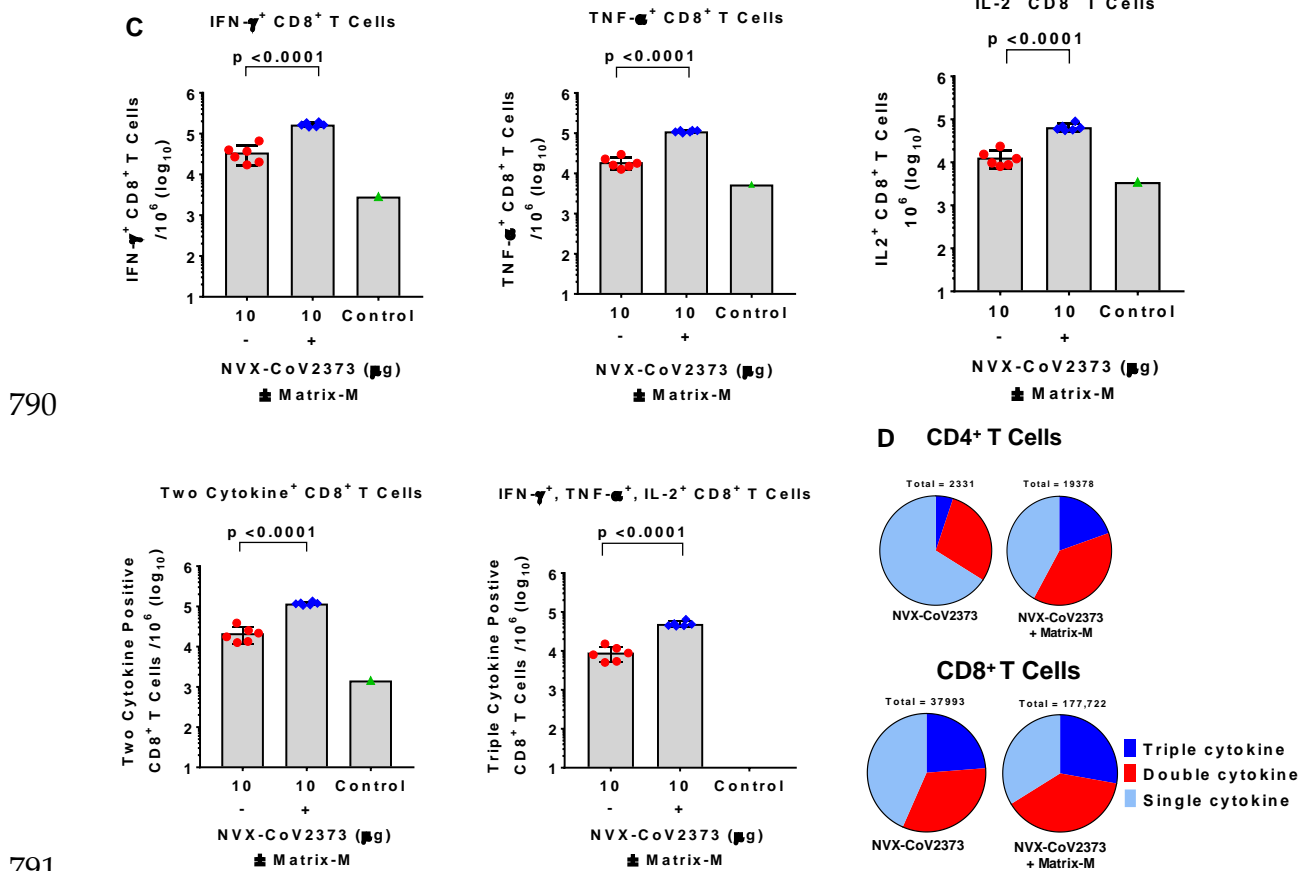

790

791

792 **Fig. 6. Multifunctional cytokine analysis of SARS-CoV-2 S-specific CD4<sup>+</sup> and CD8<sup>+</sup>**

793 **T cells in immunized mice.** Groups of mice (N = 6/group) were immunized with 10  $\mu$ g

794 NVX-CoV2373 with and without 5  $\mu$ g Matrix-M adjuvant in 2 doses spaced 21-days

795 apart. A negative control group (N = 3) was not immunized. Splenocytes were collected

796 7-days after the second immunization (day 28) and stimulated with a peptide pool (PP)

797 that covers the entire spike protein for 6 hours. **(A)** The number of IFN- $\gamma$  secreting cells

798 per million splenocytes was determined by ELISPOT. **(B and C)** The frequency of CD4<sup>+</sup>

799 memory T cells and CD8<sup>+</sup> memory T cells producing IFN- $\gamma$ , TNF- $\alpha$ , and IL-2, or at least

800 2 of 3 cytokines was determined by intracellular cytokine staining (ICCS). Analyzed cells

801 were gated on the CD44<sup>hi</sup>CD62L<sup>-</sup> effector memory population. Bars represent the mean

802 values and the error bars indicate  $\pm$  SEM. Significant differences between groups

803 vaccinated with and without adjuvant are indicated. **(D)** Pie charts represent the relative  
804 proportion of CD4<sup>+</sup> and CD8<sup>+</sup> T cells producing one, two, or three cytokines (IFN- $\gamma$ ,  
805 TNF- $\alpha$ , and IL-2) in mice immunized with NVX-CoV2373 antigen with and without  
806 adjuvant.

807

808 **Figure 7.**

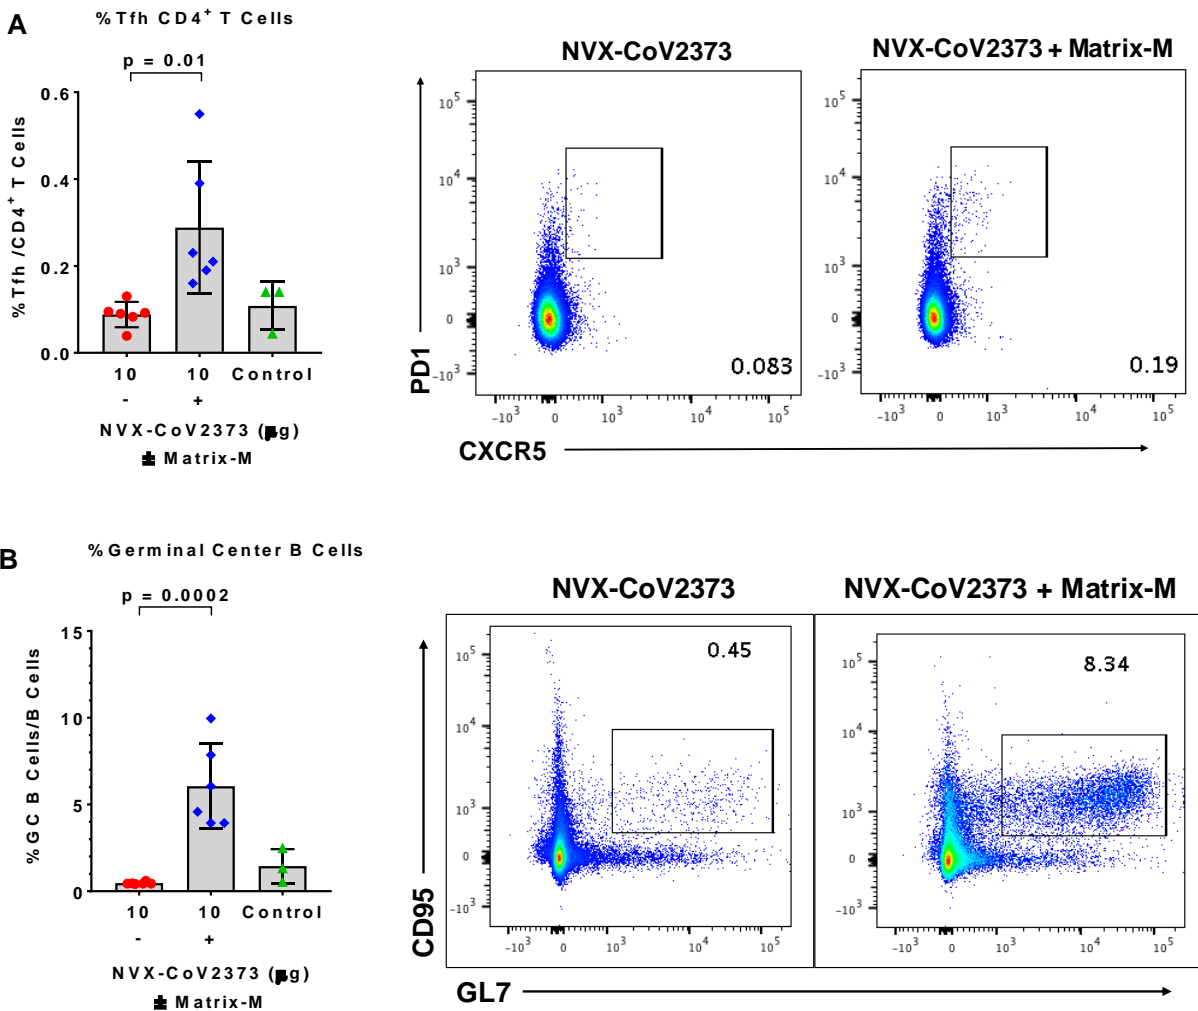

809

810

811 **Fig. 7. Frequencies of follicular helper T cell (Tfh) and germinal center (GC) B**  
812 **cells generated by immunization with NVX-CoV2373 and Matrix-M adjuvant. Mice**  
813 **were immunized with NVX-CoV2373 with and without Matrix-M adjuvant and**  
814 **splenocytes were collected 7-days after the second immunization. (A) The frequency of**  
815 **splenic Tfh cells (CXCR5<sup>+</sup> PD-1<sup>+</sup> CD4<sup>+</sup>) in the CD4 T population. (B) The frequency of**  
816 **splenic germinal center (GC) B cells (GL7<sup>+</sup> CD95<sup>+</sup> CD19<sup>+</sup>) in B cells. Bars represent the**  
817 **mean values and the error bars indicate  $\pm$  SEM. Significant differences between groups**  
818 **are indicated.**

819

820 **Figure 8.**

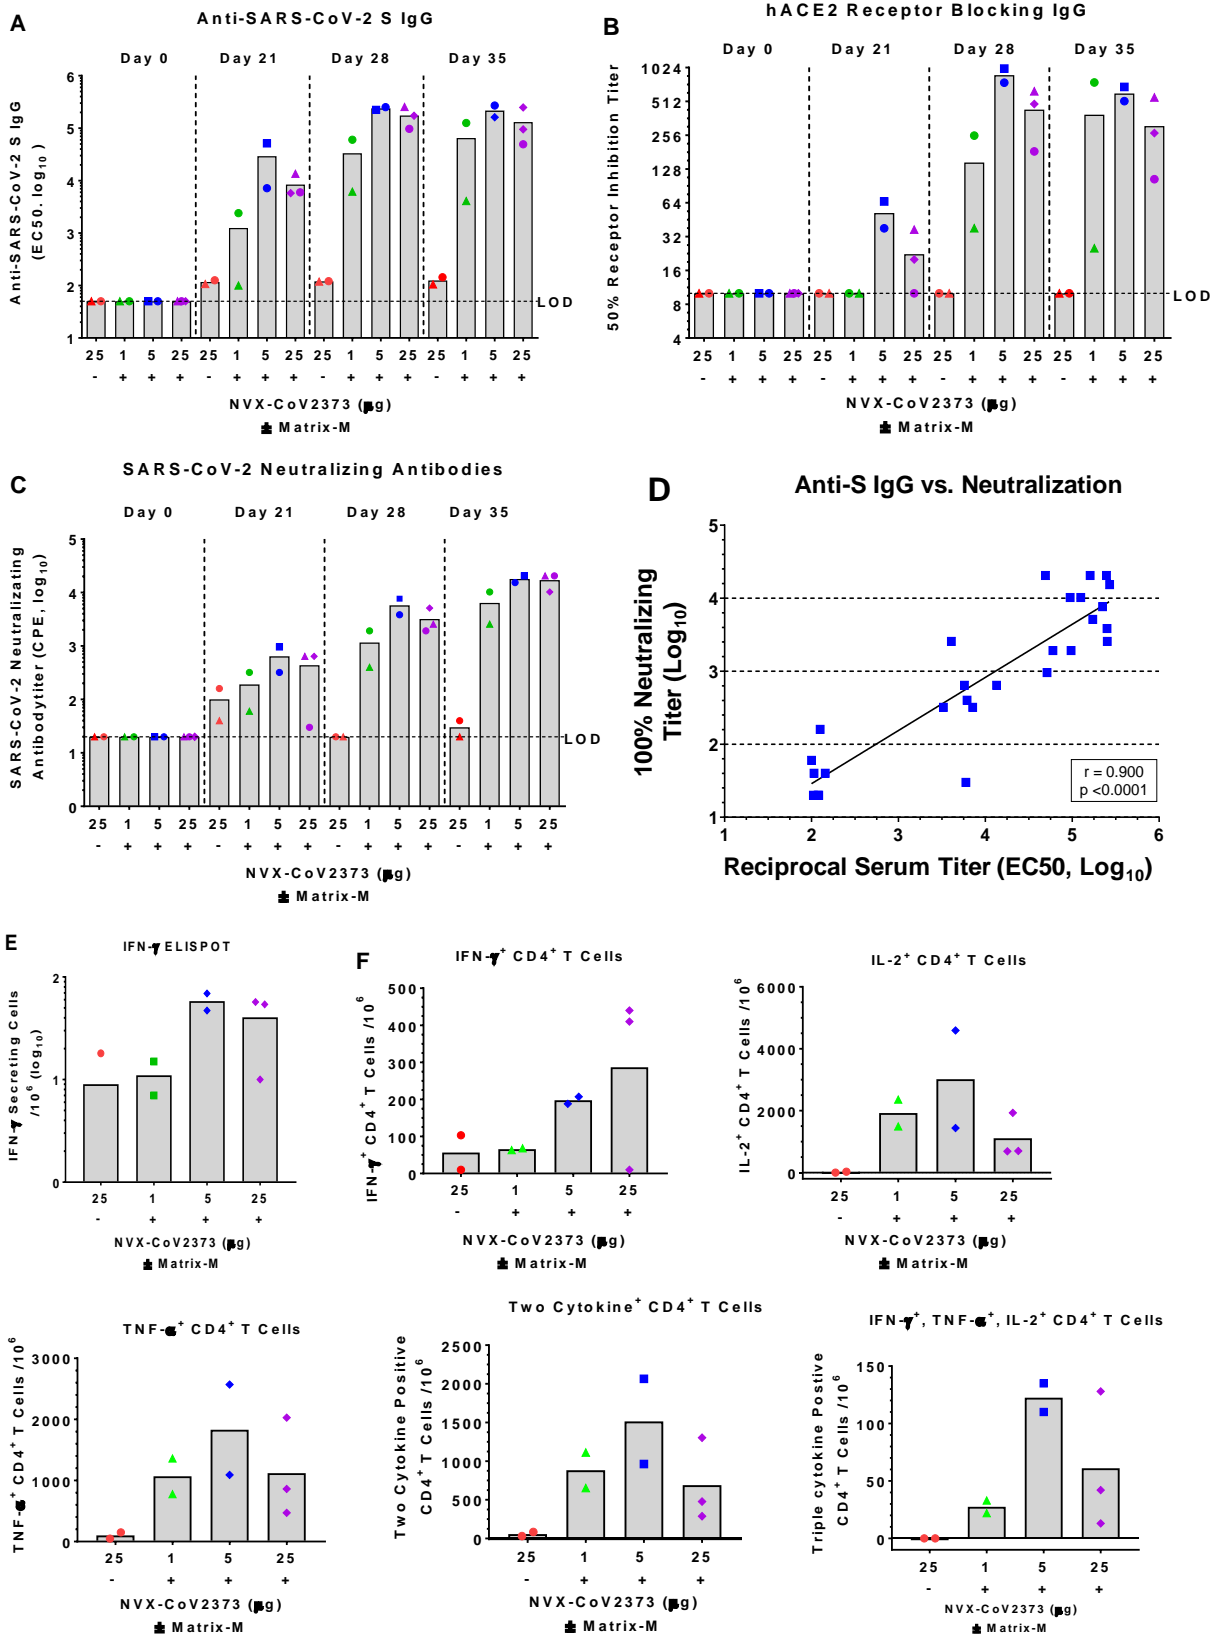

821

822

823

824

825 **Fig. 8. Humoral and cellular immune response to NVX-CoV2373 with and without**  
826 **Matrix-M adjuvant in baboons.** Baboons were randomly assigned to groups (N = 2-  
827 3/group) and immunized by IM injection with 1, 5, or 25 µg of NVX-CoV2373 and 50 µg  
828 Matrix-M adjuvant in 2-doses spaced 21-days apart (D0 and D21). A separate group (N  
829 = 2) received 2-doses of 25 µg NVX-CoV2373 without adjuvant. For serologic analysis,  
830 serum was collected prior to immunization (D0) and 21, 28, 35 and 49 days after the  
831 first immunization. **(A)** Anti-SARS-CoV-2 S IgG titers were determined by ELISA. **(B)**  
832 human ACE2 receptor blocking antibodies were determined by ELISA. **(C)** SARS-CoV-2  
833 neutralizing antibodies determined by *in vitro* inhibition of cytopathic effect (CPE). Bars  
834 represent mean titers. Limit of detection (LOD). **(D)** Correlation of anti-SARS-CoV-2 S  
835 IgG titers vs SARS CoV-2 neutralizing antibodies. Peripheral blood mononuclear cells  
836 (PBMCs) were collected 7-days after the second immunization (study day 28) and re-  
837 stimulated with NVX-CoV2373 spike protein. **(E)** IFN-γ-secreting PBMCs re-stimulated  
838 with NVX-CoV2373 protein were determined by ELISPOT. **(F)** Frequency of SARS-  
839 CoV-2 spike-specific CD4<sup>+</sup> T cells producing single and multiple combinations of type 1  
840 cytokines IFN-γ, TNF-α, and IL-2 determined by intracellular cytokine staining (ICCS).  
841 Solid bars represent the mean values.

842



843 **Figure 9.**

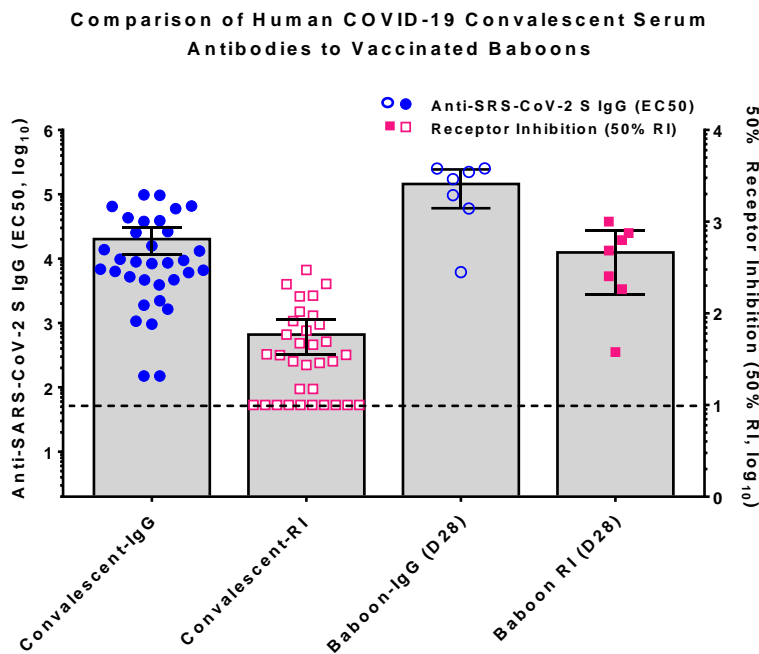

844

845 **Fig. 9. Comparison of COVID-19 human convalescent serum antibody levels to**  
846 **NVX-CoV2373 vaccinated baboon antibody levels.** Convalescent serum was  
847 collected from recovered COVID-19 patients 4-6 weeks after testing positive for SARS-  
848 CoV-2. Sera were analyzed for anti-SARS-CoV-2 S IgG and human ACE2 receptor  
849 inhibition antibody levels (50% RI) and antibody levels compared to levels in serum of  
850 NVX-CoV2373 with Matrix-M immunized baboons as described in **Fig. 8**. The bars  
851 represent the group mean and error bars indicate the 95% confidence interval. Dashed  
852 line indicates the limit of detection (LOD).

853

**Table 1. Particle Size and Thermostability of SARS-CoV-2 Trimeric Spike Proteins**

| SARS-CoV-2 S-proteins | Differential Scanning Calorimetry (DSC) |                | Dynamic Light Scattering (DLS)   |                  |
|-----------------------|-----------------------------------------|----------------|----------------------------------|------------------|
|                       | T <sub>max</sub> (°C) <sup>1</sup>      | ΔHcal (kJ/mol) | Z-avg diameter (nm) <sup>2</sup> | PDI <sup>3</sup> |
| <b>Wild-type</b>      | 58.6                                    | 153            | 69.53                            | 0.46             |
| <b>BV2365</b>         | 61.3                                    | 466            | 33.40                            | 0.25             |
| <b>NVX-CoV2373</b>    | 60.4                                    | 732            | 27.21                            | 0.29             |

<sup>1</sup> T<sub>max</sub>: melting temperature  
<sup>2</sup> Z-avg: Z-average particle size  
<sup>3</sup> PDI: polydispersity index

854
